1  
2  
3  
4  
5  
6  
7  
8  
9  
10  
11  
12  
13  
14  
15  
16  
17  
18  
19  
20  
21  
22  
23  
24  
25  
26  
27  
28  
29  
30  
31  
32  
33  
34  
35  
36  
37  
38  
39

---

## Lineage and Spatial Mapping of Glioblastoma-associated Immunity

---

**Vidhya M. Ravi**<sup>1,2,3,4,#</sup>, **Nicolas Neidert**<sup>1,2,3,#</sup>, Paulina Will<sup>1,2,3</sup>, Kevin Joseph<sup>1,2,3</sup>, Julian P. Maier<sup>1,2,3</sup>, Jan Kückelhaus<sup>1,2,3</sup>, Lea Vollmer<sup>1,2,3</sup>, Jonathan M Goeldner<sup>1,2,3</sup>, Simon P. Behringer<sup>1,2,3</sup>, Florian Scherer<sup>3,5</sup>, Melanie Boerries<sup>3,6,7,8</sup>, Marie Follo<sup>3,5</sup>, Tobias Weiss<sup>9</sup>, Daniel Delev<sup>10,11</sup>, Julius Kernbach<sup>10,11</sup>, Pamela Franco<sup>3,4</sup>, Nils Schallner<sup>3,12</sup>, Christian Scheiwe<sup>2,3</sup>, Maria Stella Carro<sup>3,4</sup>, Ulrich G. Hofmann<sup>3,4</sup>, Christian Fung<sup>2,3</sup>, Jürgen Beck<sup>2,3,15</sup>, Roman Sankowski<sup>3,13</sup>, Marco Prinz<sup>3,13,14,15</sup>, **Oliver Schnell**<sup>2,3,16,†</sup>, **Dieter Henrik Heiland**<sup>1,2,3,†</sup>

<sup>1</sup>*Microenvironment and Immunology Research Laboratory, Medical Center, University of Freiburg, Germany*

<sup>2</sup>*Department of Neurosurgery, Medical Center, University of Freiburg, Germany*

<sup>3</sup>*Faculty of Medicine, Freiburg University, Germany*

<sup>4</sup>*Neuroelectronic Systems, Medical Center, University of Freiburg, Germany*

<sup>5</sup>*Department of Medicine I, Medical Center – University of Freiburg, Faculty of Medicine, University of Freiburg, Germany.*

<sup>6</sup>*Institute of Medical Bioinformatics and Systems Medicine, Medical Center-University of Freiburg, 79110 Freiburg, Germany.*

<sup>7</sup>*Comprehensive Cancer Center Freiburg (CCCF), Faculty of Medicine and Medical Center - University of Freiburg, 79106 Freiburg, Germany.*

<sup>8</sup>*German Cancer Consortium (DKTK), partner site Freiburg.*

<sup>9</sup>*Department of Neurology and Brain Tumor Center, University Hospital Zurich and University of Zurich, Switzerland*

<sup>10</sup>*Department of Neurosurgery, RWTH University of Aachen, Aachen, Germany*

<sup>11</sup> *Neurosurgical Artificial Intelligence Laboratory Aachen (NAILA), Department of Neurosurgery, RWTH University of Aachen, Aachen, Germany*

<sup>12</sup>*Department of Anesthesiology and Critical Care Medicine, Medical Center-University of Freiburg, 79106 Freiburg, Germany*

<sup>13</sup>*Institute of Neuropathology, Medical Center - University of Freiburg,*

<sup>14</sup>*Signalling Research Centres BIOS and CIBSS, University of Freiburg, Germany*

<sup>15</sup>*Center for NeuroModulation (NeuroModul), University of Freiburg, Freiburg, Germany*

<sup>16</sup>*Translational NeuroOncology Research Group, Medical Center, University of Freiburg, Germany*

**# Equal contributed first authorship**

**† Equal contributed last authorship**

**DISCLOSURE OF CONFLICTS OF INTEREST:** No potential conflicts of interest were disclosed by the authors.

40 **Corresponding author:**

41 Dieter Henrik Heiland

42 Department of Neurosurgery

43 Medical Center University of Freiburg

44 Breisacher Straße 64

45 79106 Freiburg

46 -Germany-

47 Tel: +49 (0) 761 270 50010

48 Fax: +49 (0) 761 270 51020

49 E-mail: [dieter.henrik.heiland@uniklinik-freiburg.de](mailto:dieter.henrik.heiland@uniklinik-freiburg.de)

50

51 **Highlights:**

- 52       • Lineage tracking of T cells reveal IL10 driven exhaustion in glioblastoma
- 53       • *In-silico* modeling of spatial- and scRNA-sequencing identified a subset of *HMOX1*<sup>+</sup>
- 54       myeloid cells releasing IL10.
- 55       • T cell exhaustion is spatially enriched in mesenchymal-like tumor regions.
- 56       • Human neocortical sections with autograft T cell stimulation confirmed IL10
- 57       dependent T cell exhaustion in mesenchymal-like tumors.

58

59 **Visual Abstract:**

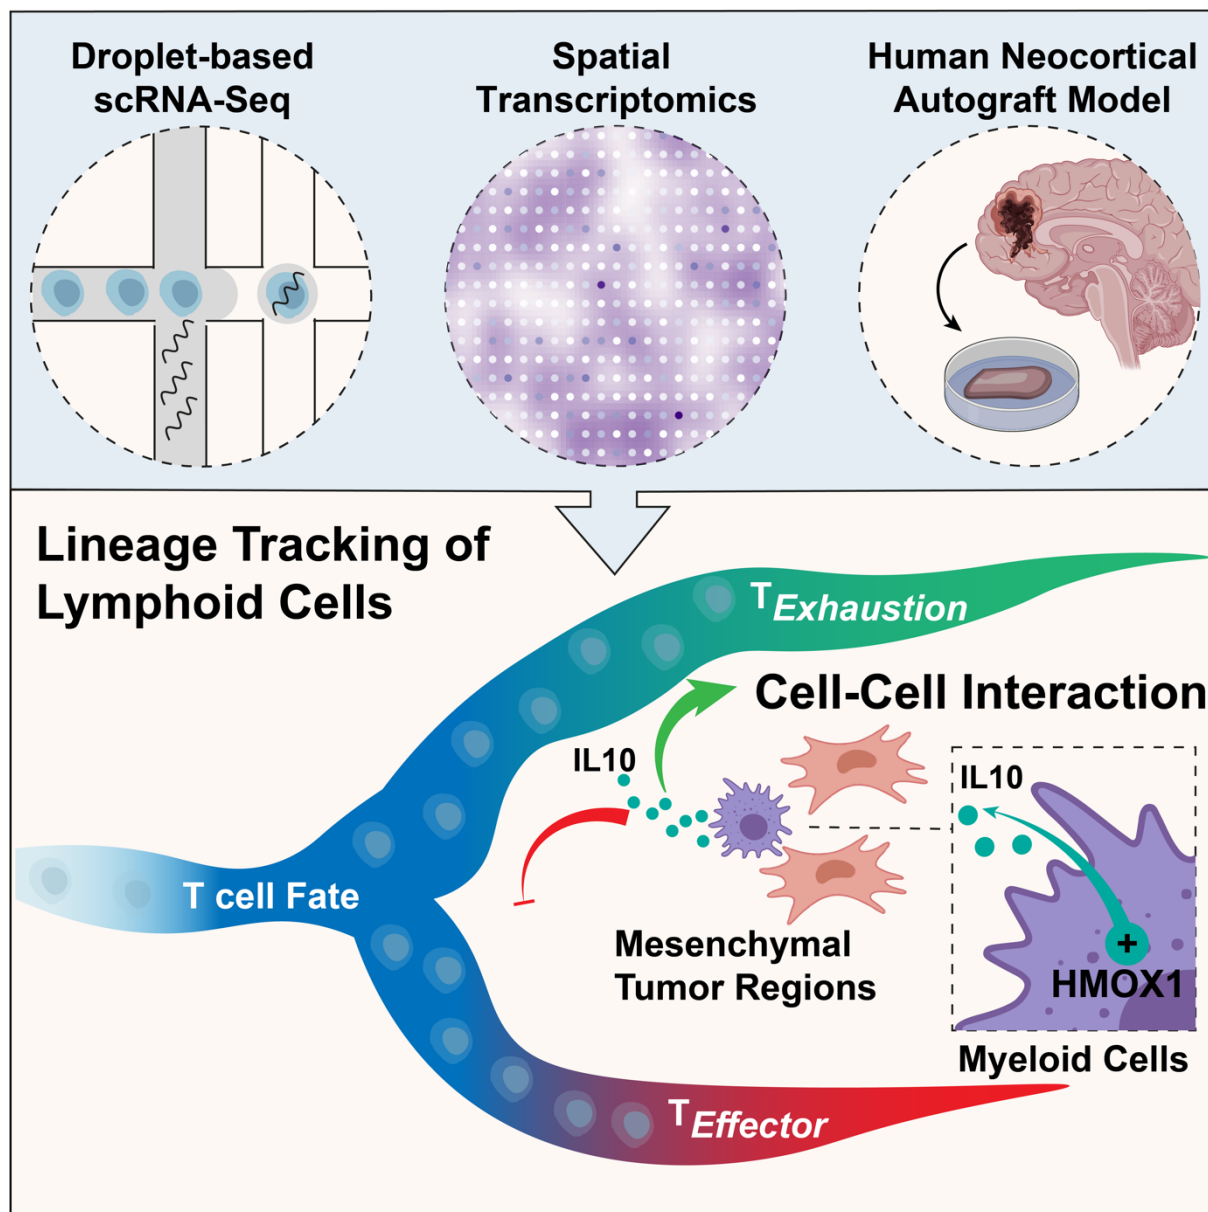

60



61

62 **Abstract**

63 The diversity of molecular states and cellular plasticity of immune cells within the glioblastoma  
64 environment remain poorly investigated. Here, we performed scRNA-sequencing of the immune  
65 compartment, mapping potential cellular interactions that lead to the exhausted phenotype of T cells.  
66 We identified Interleukin 10 response during T cell activation leading to the exhausted state. By use of  
67 an *in-silico* model, we explored cell-cell interactions and identified a subset of myeloid cells defined by  
68 high expression of *HMOX1* driving T cell exhaustion. We showed a spatial correlation between T cell  
69 exhaustion and mesenchymal-like gene expression, co-located with *HMOX1* expressing myeloid cells.  
70 Using human neocortical sections with myeloid cell depletion, we confirmed the functional interaction of  
71 myeloid and lymphoid cells, leading to the exhausted state of T cells. A comprehensive understanding  
72 of cellular states and plasticity of lymphoid cells in GBM aids in providing successful immunotherapeutic  
73 approaches.

74

## 75 Introduction

76 Tumor infiltrating lymphocytes along with brain resident and migrated myeloid cells on the other side,  
77 account for a meaningful part of tumor microenvironment in glioblastoma<sup>1-3</sup>. Most recently, the  
78 characterization of the myeloid cell population using scRNA-sequencing revealed a remarkable  
79 heterogeneity regarding cellular diversity and plasticity within the myeloid compartment<sup>1,4</sup>. Rather, the  
80 diversity of lymphoid cell types in malignant brain tumors has been poorly explored, although gaining  
81 insights into the heterogeneity of cell type composition and properties of gene expression will aid in  
82 providing successful approaches for immune therapy in the future. In other cancer entities such as  
83 colorectal cancer<sup>5</sup>, liver cancer<sup>6</sup> or melanoma<sup>7</sup>, different states of T cells have been investigated.  
84 Prolonged immune activation and ambiguous stimulation, such as uncontrolled tumor growth or chronic  
85 infections, reduces the ability of CD8<sup>+</sup> lymphocytes to secrete proinflammatory cytokines and maintain  
86 their cytotoxic activity<sup>7-9</sup>. This cellular state, named dysfunctional or "exhausted" CD8<sup>+</sup> lymphocytes,  
87 represents a paramount barrier to successful vaccination or checkpoint therapy<sup>2,10,11</sup>. T cell exhaustion  
88 is partially orchestrated by regulation via inhibitory cell surface receptors (PD-1, CTLA-4, LAG-3, TIM-3  
89 and others) and anti-inflammatory cytokines such as IL-10 and TGF-beta. Glioblastoma, a common and  
90 very aggressive primary brain tumor in adults, is archetypical for tumors with a strong  
91 immunosuppressive microenvironment<sup>12</sup> and current immunotherapeutic approaches such as PDL1/PD1  
92 checkpoint blockade<sup>13</sup> or peptide vaccination<sup>14</sup>, which led to remarkable responses in several cancers,  
93 failed to demonstrate activity in patients with glioblastoma.

94 To address the limited knowledge of lymphoid cell population in glioblastoma, we performed deep  
95 transcriptional profiling by scRNA-sequencing, mapped potential cellular interactions and cytokine  
96 responses that could lead to the dysfunctional and exhausted phenotype of T cells. Pseudotime analysis  
97 revealed increased Interleukin 10 (IL10) response during the transformation from the effector to the  
98 exhausted state in T cells. To computationally explore connected cells driving this transformation, we  
99 introduced a novel approach termed "*nearest functionally connected neighbor* (NFCN)", which identified  
100 a subset of myeloid cells marked by *CD163*<sup>+</sup> and *HMOX1*<sup>+</sup> expression. Furthermore, we applied spatial  
101 transcriptomics, which confirmed a spatial overlap of exhausted T cells with *HMOX1*<sup>+</sup> myeloid cells within  
102 mesenchymal enriched regions. Further, using a human neocortical slice model with myeloid cell  
103 depletion and T cell stimulation, we validated our findings from the computational approach, which  
104 depicts the role of myeloid cells as drivers of T cell exhaustion.

105 **Results:**

106 **scRNA-Seq Charts the Immune Cell Compartment in Glioblastoma**

107 In order to interrogate the diversity of the immune microenvironment in untreated glioblastomas, we  
108 profiled freshly obtained tumor specimens from 4 glioblastoma patients at first diagnosis using 3'-  
109 scRNA-seq (droplet-based 10X Genomics). To focus on the immune environment, in particular the  
110 heterogeneity of T cells, we sorted cells for the pan T cell marker CD3<sup>+</sup>, **Figure 1a and Supplementary**  
111 **Figure 1a**. The scRNA-seq data consisted of 17,705 cells, with a median number of 2,022 unique  
112 molecular identifiers (UMIs) and approximately 897 uniquely expressed genes per cell. We corrected  
113 the data for the percentage of mitochondrial genes and removed batch effects due to technical artifacts.  
114 Next, we decomposed eigenvalue frequencies of the first 100 principal components and determined the  
115 number of non-trivial components by comparing them to randomized expression values, resulting in 35  
116 meaningful components. Shared nearest neighbor (SNN) graph clustering resulted in 17 clusters  
117 containing significantly uniquely expressed genes, **Supplementary Figure 1b-c**. The major observed  
118 cell type when using the semi-supervised subtyping algorithm of scRNA-seq (SCINA-Model)<sup>15</sup> and  
119 SingleR<sup>16</sup> are microglia cells (*TMEM119*, *CX3CR1* and *P2RY12*) and macrophages (*AIF1*, *CD68*,  
120 *CD163* and low expression of *TMEM119*, *CX3CR1*), followed by CD8<sup>+</sup> T cells (*CD8A*, *CD3D*), natural  
121 killer cells (*KLRD1*, *GZMH*, *GZMA*, *NKG7* and *CD52*), CD4<sup>+</sup> T cells (*BCL6*, *CD3D*, *CD4*, *CD84* and  
122 *IL6R*), T-memory cells (*TRBC2*, *LCK*, *L7R* and *SELL*), granulocytes (*LYZ*), a minor amount of  
123 oligodendrocytes and oligodendrocyte-progenitor cell (OPC's) (*OLIG1*, *MBP*, *PDGFA*), and endothelia  
124 cells (*CD34*, *PCAM1*, *VEGFA*) **Figure 1b and Supplementary Figure 1c-g**. Furthermore, we inferred  
125 largescale copy number variations (CNVs) from scRNA-seq profiles by averaging expression over  
126 stretches of 100 genes on their respective chromosomes<sup>17</sup>. We confirm that there was only a very low  
127 level of contaminating tumor cells present (clustered as OPC cells), based on their typical chromosomal  
128 alterations (gain in chromosome 7 and loss in chromosome 10), **Supplementary Figure 2**.

129

130 **Diversity of T cells in the Glioblastoma Microenvironment**

131 To investigate the diversity of T cells in the microenvironment, we examined them by two different but  
132 complementary methods. First, in-silico the T cells were isolated by clustering (as shown above), based  
133 on their published marker gene expression profile (CD3<sup>+</sup>, CD4<sup>+</sup>/CD8<sup>+</sup>). Secondly, they were isolated  
134 using the SCINA model, which result in a total number of 2,891 cells (detailed description in the method  
135 part), **Figure 1c**. To focus on the different regulatory states of these cells, we identified five subgroups

136 using SNN-clustering as well as pseudotime trajectories (STREAM<sup>18</sup>), closely reflecting the different  
137 activation states as recently described<sup>8</sup>, **Figure 1c and Supplementary Figure 3a**. Pseudotime  
138 analysis is a computational approach by reconstructing lineage differentiation trajectories, which provide  
139 insights into transformation of cells over time and map fate decisions<sup>18</sup>. Cluster 1 contains cells marked  
140 by the expression of *CCL5* and *NKG7* and is enriched with the signature of naive T cells<sup>8</sup> (resting T  
141 cells), **Supplementary Figure 3a-b**, whereas the signature genes of activated T cells was enriched in  
142 cluster 2 (*GNLY*, *TNFAIP3*, *GZMB*), **Supplementary Figure 3 a-b**. Clusters 3 and 4 contain high  
143 expression of known exhaustion markers such as *HAVCR2*, *CYBB* and *VSIR*, and are highly enriched  
144 for the T cell exhaustion signature, **Figure 1d and Supplementary Figure 3 a-b**. However, cluster 3  
145 revealed strong expression of proliferation markers such as *TOP2A* and *MKI67*, and enriched for the  
146 proliferation signature (GSEA), **Figure 1e**, and uniquely expressed markers of the dysfunctional  
147 activated state, suggesting that these cells represent an intermediate state between T effector cells and  
148 fully exhausted T cells. Based on our findings, we define cluster 1 as naive T cells (*SELL*, *CCR7* and  
149 *IL7R*) with enriched WNT signaling, cluster 2 represents T effector cells (*CD28*, *ICOS* and *IL2RB*) and  
150 showed IL2/IL12 pathway enrichment. The exhaustion clusters (cluster 3 and 4) were highlighted by a  
151 subset of exhaustion markers, **Figure 1d**, although classical markers such as *CTLA4* or *PDCD1* are  
152 lacking, **Supplementary Figure 3c**.

153

#### 154 **Dysfunctional State of T cells Driven by IL-10 Signaling**

155 To gain insights into the regulatory mechanism involved, we reconstructed fate decisions made during  
156 T cell exhaustion using pseudotime trajectories. We identified 3 branches and 4 states in the present  
157 dataset in which T cells can exist, ranging from effector T cells to dysfunctional activation and  
158 exhaustion, **Figure 1c,f**. In the following section, SNN-clustering of T cells will be referred to as C1-5  
159 and pseudo-timepoints as S0-3. We noticed that in both effector T cells (S3) as well as in dysfunctional  
160 activated and exhausted T cells, that proliferation markers remained upregulated (*TOP2A*, *MKI67*),  
161 **Figure 1g**. Additionally, we observed an increase in the Interleukin 10 (IL10) and INF-gamma response,  
162 **Figure 1h**, while *IFNG* expression was found exclusively in effector T cells (S3), **Supplementary Figure**  
163 **3d**. In addition, we arranged all cells along the trajectory from S3 (effector T cells) over the states: from  
164 S0 (naive), S1 (T cell activation) to S2 (exhausted T cells), and mapped signature genes from T cell  
165 activation and exhaustion, **Figure 1i**, as well as pathway enrichments (**Figure 1i top**) of the IL-10 and  
166 IFN-gamma pathway. Leaf genes of the S3 branch were more likely mapped to T cell activation, whereas

167 leaf genes of S2 were more likely to be classified as exhausted genes. We also showed that genes of  
168 the IL-10 signature belonged to the set of transient genes that remained increased during the activation  
169 process of T cells as well in the exhausted state, **Figure 1i**. In summary, our data suggested that  
170 response to IL-10 and IFN-gamma contributed to the dysfunctional state of T cells and affected fate  
171 decisions. To gain insights into accurate downstream signaling of IL-10, IFN-gamma, as well as IL2, we  
172 created a library of the 50 most highly up- and downregulated genes, **Figure 2a-b**. Next, we extracted  
173 signatures observed in the different T cell clusters and compared them with the stimulation T cells. As  
174 expected, IL2 upregulated genes were significantly enriched in clusters 1 and 2, while IFN gamma and  
175 IL-10 marker genes showed a significant enrichment in the dysfunctional clusters 3 and 4, **Figure 2c**.  
176 Furthermore, we mapped signature genes from T cell clusters 1-4 along the different stimulations,  
177 **Figure 2d**. In agreement with our assumed conclusions a large subset of exhausted genes was highly  
178 enriched in T cells stimulated with IL-10 alone or in combination with IFN-gamma (*CYBB*, *HAVCR2*,  
179 *LAG3*, *VSIR*, *CTLA4*). Stimulation with IL2 caused increased activation marked by *GNLY*, *NKG7*, *IL2RB*.

180

### 181 **A Subset of Microglia and Macrophages Drive IL-10 Stimulation**

182 In our recent investigation<sup>19</sup>, the crosstalk between reactive astrocytes of the tumor microenvironment  
183 and microglia cells was found to be responsible for upregulating IL10 release through  
184 microglia/macrophages caused by stimulation with IFN gamma and leading to JAK/STAT activation in  
185 tumor-associated astrocytes. In this study we introduce the “nearest functionally connected neighbor”  
186 algorithm, an in-silico model to identify the most likely related cell pairs through divergent down- and up-  
187 stream signal activity, **Figure 3a**. In our model, we assume that cellular interaction with distinct mutual  
188 activation implies two fundamental prerequisites. On the one hand the ligand needs to be expressed  
189 and released, or otherwise exposed on the cell surface. To avoid the chances of randomly elevated  
190 expression or technical artifacts, we also looked at simultaneous occurrence of ligand induction  
191 (upstream pathway signaling). On the other hand, the receptor needs to be expressed, and the  
192 downstream signaling has to be activated as well. This allows predicting the functional status of the  
193 receiver cell (Explanation of the model can be found in the methods section, with an overview in the  
194 **Figure 3a**).

195 We used our in-silico-model to screen for potential cells responsible for IL-10 activation of T cells. The  
196 algorithm identified pairs of lymphoid (T cell clusters) and myeloid cells (macrophages and microglia  
197 cluster) and estimated the likelihood of mutual activation, **Figure 3b**. By extraction of nearest connected

198 cells (top 10% ranked cells), we identified a subset of myeloid cells marked by remarkably high *IL10*  
199 expression, **Figure 3b**. Within the receiver cells most of the connected cells (top 10% ranked cells)  
200 originated from the exhausted T cell clusters 3 and 4, **Figure 3c-d**. The ligand cells that release IL10  
201 (ligand-cells) on the other hand were located in the myeloid clusters (clusters 4 and 5, according to the  
202 initial SNN-clustering containing the whole dataset), **Supplementary Figure 1**, and predominantly  
203 expressed the markers of activated myeloid cells (*CD163*, *CD68*), as well as recently described marker  
204 genes for glioma-associated microglia (GAM)<sup>4</sup> cells (*VEGFA* and *SPP1*), **Supplementary Figure 4**. The  
205 highly connected ligand cells showed little to no expression of the inflammatory genes *IL1B* or *IL6*,  
206 **Supplementary Figure 4**. In order to explore the difference between connected and non-connected  
207 cells we examined in-silico extract connected and non-connected cells, which were defined by the  
208 highest and lowest interaction-scores (quantile 97.5%). Using differential gene expression analysis we  
209 observed multiple genes which confirmed the non-inflammatory polarization status of highly connected  
210 cells. These findings are not surprising, since one of the essential markers of non-inflammatory myeloid  
211 cells is *IL10*. We showed that the subset of most highly connected cells, marked by *CD168<sup>+</sup> - VEGFA<sup>+</sup>*  
212 *- IL1B<sup>-</sup> - IL6<sup>-</sup>* express increased levels of heme oxygenase 1 (*HMOX1*). *HMOX1* is activated during  
213 inflammation and oxidative injuries and is regulated through the Nrf2/Bach1-axis, as well as through the  
214 IL10/HO1-axis. This gene is also well known to be upregulated in alternative activated macrophages<sup>20</sup>.  
215 Consistent with our findings, most downstream signals of the IL10/HO1-axis such as STAT3 and p38  
216 MAPK were found to be upregulated in a gene set enrichment analysis, **Figure 3f and g**. Another  
217 immunosuppressive signaling marker closely related to the alternative activation of  
218 macrophages/microglia is the release of TGF beta<sup>21</sup>, which was also found to be up-regulated in highly  
219 connected cells, **Figure 3g**.

220

## 221 **T cell Activation and Exhaustion Reveals Spatial Heterogeneity and Association with** 222 **Glioblastoma Subtype**

223 For glioblastoma, a tumor with a high degree of heterogeneity due to regional metabolic differences and  
224 varying composition of the tumor microenvironment, the prediction of connected cells needs to be  
225 confirmed by looking at the spatial overlapping of interacting cells. Mapping of spatial gene expression  
226 is a novel technique used to overcome the limitation of scRNA-seq, which lacks spatial information,  
227 **Figure 4a**. We performed spatial transcriptomic RNA sequencing (stRNA-seq) of 3 confirmed  
228 glioblastomas of the IDH1/2 wild-type, containing a total number of 2,352 spots correctly aligned to the

229 H&E image, **Figure 4a**. We observed a median of 8 cells per spot (range: 4 to 22 cells per spot), which  
230 allows the spatial mapping of gene expression, but not at single cell resolution. However, when we  
231 compared our dataset to the recent classification of glioblastoma<sup>22</sup>, consistent results were obtained in  
232 accordance to the diversity of subtype expression, **Figure 4b**. We used loess-fitted surface plots to map  
233 the gene set enrichment of either T cell activation (cluster 2) or T cell exhaustion (clusters 3 and 4),  
234 **Figure 4c-d**, which were highly heterogeneously distributed across patients. Whereas the first patient  
235 predominantly revealed areas with T cell exhaustion, **Figure 4d upper panel**, the others appeared more  
236 balanced, although the percentage of exhausted spots still dominated. Further, we showed the spatial  
237 overlap of the exhaustion marker genes (cluster 3) and IL10 response, **Figure 4e**. The spatial  
238 distribution was found to be consistent when using a published set of genes, which characterized the  
239 exhausted state of T cells. In a next step, we validated which expression subtype was spatially correlated  
240 with T cell exhaustion according to the novel molecular classification<sup>22</sup>. By overlaying the gene set  
241 expression and GBM subtype maps, we observed that “exhausted” regions were mainly occupied by  
242 mesenchymal regions, **Figure 4f**. We aligned all spots (sample 1-3) along a trajectory reflecting the  
243 enrichment of T cell exhaustion (using enrichment scores, detailed description in the methods), and  
244 mapped the signature genes of each molecular subtype for the same spot, **Figure 4g**. Thereby, we  
245 confirmed that in highly exhausted regions, signature genes of the mesenchymal subtype are also highly  
246 expressed.

247

#### 248 **Spatial Correlation of HMOX1<sup>+</sup>-Myeloid Cells and T cell Exhaustion Signatures**

249 With our NFCN-algorithm we screened for spots containing IL10 release and response and used both  
250 outputs to find overlapping regions within the spatial dataset, **Figure 5a**. The identified regions of high-  
251 IL10 signaling overlap with signatures reflecting T cell exhaustion (marker gene cluster 3) and marker  
252 genes of the connected cells identified above (*CD163*, *IL10*, *CD68*, *HMOX1*), **Figure 5b-c**. Furthermore,  
253 using the non-connected signatures (*IL1B*, *IL6*, *CD68*), we verify distinct localizations of myeloid states,  
254 **Figure 5c**. We observed a strong overlap between the connected cells and the expression of exhaustion  
255 markers, suggesting that our data confirm the interaction between HMOX1<sup>+</sup> myeloid cells and exhausted  
256 T cells.

257

#### 258 **Loss of Myeloid Cells Increases Antitumor Immunity**



259 To further provide evidence for our findings from computational approach, we made use of recently  
260 described human neocortical slice model in which the cellular architecture of the CNS is well preserved  
261 <sup>19,23</sup>. We cultured non-infiltrated cortical slices (defined in a recent report<sup>19,23</sup>) with and without myeloid  
262 cell depletion, as recently described to understand the communication between myeloid cells in the  
263 tumor microenvironment along with lymphoid cells. Three days post depletion of myeloid cells using  
264 11mM clodronate we injected a primary cell line (BTSC#233, GFP-tagged) characterized by RNA-seq  
265 profiling as mesenchymal<sup>24</sup>. Post tumor growth, we injected peripheral T cells (same donors), tagged  
266 by CellTrace™ Far Red (CTFR) and incubated the slices for another 24h, **Figure 6a**. By immunostaining  
267 we showed that myeloid cell depletion reduces the number of IBA1<sup>+</sup> cells along with most of HMOX1<sup>+</sup>  
268 cells, **Figure 6b**. Using enzyme-linked immunosorbent assay (ELISA) we found a significant reduction  
269 in IL10 when myeloid cells are depleted, regardless of the presence of tumor cells, **Figure 6c**. The  
270 strongest difference in IL10 release was observed between myeloid depleted slices in the presence of  
271 tumor cells, **Figure 6c**. Furthermore, we stained for Granzyme B (GZMB<sup>+</sup>) T cells and quantified IL2  
272 release to examine the amount of effector T cells in depleted or non-depleted slices. We found an  
273 increased number of GZMB<sup>+</sup> T cells in myeloid depleted slices, **Figure 6d**, along with significant  
274 increase of IL2 release, **Figure 6e**. Differences in IFN gamma release were not observed, **Figure 6f**.  
275 We also stained for the exhaustion marker TIM3 (Gen: *HAVCR2*), which was found to be enriched in  
276 exhausted T cells, and observed a loss of expression in the myeloid depleted slices, **Figure 6g**,  
277 suggesting that myeloid derived IL10 release (by HMOX1<sup>+</sup> cells) leads to T cell exhaustion, which is in  
278 line with the computational model.  
279



280 **Discussion:**

281 Although single-cell RNA-sequencing accurately maps the cellular architecture and reflects the diversity  
282 of cellular states<sup>17,22,25,26</sup>, spatial information is lacking. Here we combine single cell RNA sequencing of  
283 the immune compartment with spatial transcriptomic RNA-sequencing (stRNA-seq) to gain better  
284 insights into the complex crosstalk, cellular states and cellular plasticity leading to the  
285 immunosuppressive environment found in glioblastoma (GBM).

286 Recent studies have reported different subtypes of microglia and macrophages occupying glial  
287 tumors<sup>1,4,22,25,26</sup> although detailed information about the lymphoid infiltration cells is lacking. There is  
288 intense interest in T cells and their varied states due to their importance to the development of targeted  
289 therapies and understanding the immunosuppressive environment of glioblastoma. Currently available  
290 data characterizing T cell infiltration at the molecular level in glioblastoma (GBM) is limited. T cell states,  
291 particularly in disease, are somehow difficult to accurately classify, leading to numerous definitions and  
292 markers in recent years<sup>2,7,27-29</sup>. While some authors use the terms "dysfunctional" and "exhausted"  
293 synonymously<sup>30</sup>, others differentiate between the dysfunctional and the exhausted states of T cells<sup>27,29</sup>.

294 In this study we use the definition of cellular states released by Singer et al., 2016<sup>8</sup>. On the basis of  
295 these gene sets our data showed that only cells which remained activated along the pseudotime-  
296 trajectory were able to enter the state of dysfunction, and later exhaustion. The dysfunction appears to  
297 be a transitional state, associated with increased proliferation, despite immunosuppressive stimulation  
298 from the tumor environment. This imbalance between pro- and anti-inflammatory signaling, dominated  
299 by IL10 secretion, leads to final exhaustion of the T cells, which is in agreement with the current  
300 literature<sup>2,31</sup>. In order to find a consensus with regard to marker genes we further validated our findings  
301 on a set of exhausted marker genes recently published in an overview study<sup>32</sup>. We and others have  
302 shown that the environment of GBM aid the evolution of immune suppression. In this process, astrocytes  
303 and myeloid cells, both driven by STAT-3 signaling, orchestrate the immunosuppressive  
304 environment<sup>4,19,33,34</sup>. Based on the knowledge that IL10 interaction plays a crucial role in the shift from  
305 activated to exhausted T cells, we build an in-silico model that identified potential connected cells that  
306 drive the T cell exhaustion. By use of this model, we identified a subset of myeloid cells marked by high  
307 expression of *HMOX1*, a gene which is induced by oxidative stress and metabolic imbalance<sup>35,36</sup>.  
308 *HMOX1* is linked to the STAT-3 pathway and induces IL-10 production via MAPK activation and in  
309 agreement with the literature all of these markers were also found to be upregulated in our connected  
310 cells. Furthermore, we used the stRNA-seq to confirm the spatial overlap of cells which were identified

311 as highly connected. We showed that the *HMOX1*-myeloid cells were spatially correlated with  
312 exhaustion and the mesenchymal state of glioblastoma. These findings are accord with published  
313 reports, revealing that the mesenchymal cells are the component of GBM responsible for the immune  
314 crosstalk<sup>22</sup>. *HMOX1* expression in GBM and IDH-WT astrocytoma was found to be increased in  
315 recurrent GBM and negatively associated with overall survival, **Supplementary Figure 5**. In addition,  
316 we made use of a human neocortical slice model with and without depletion of myeloid cells. By injecting  
317 tumor cells into the slices as well as T cells from the same donors, we simulated the function of the  
318 myeloid cells with regard to IL10 release and T cell stimulation. Fitting with our computational model,  
319 we confirmed that *HMOX1*<sup>+</sup> myeloid cells cause a reduction of effector T cells with a respective reduction  
320 in IL2 release and increased expression of our identified exhaustion marker TIM3.

321 The approach demonstrated here to integrate scRNA-seq and stRNA-seq using a variety of  
322 computational approaches does have some major limitations. First, the spatial transcriptomic array is  
323 only about 6 × 6.5 mm<sup>2</sup> in size; therefore, the array can only show a limited portion of the actual tumor,  
324 and not every spot achieves single cell resolution. In this study we used first-generation spatial  
325 transcriptomic technology, meaning the number of spots, barcoding sensitivity and diffusion of  
326 transcripts across the spots is not fully optimized and needs more investigation for future datasets. Brain  
327 tissue, and GBM specimens respectively, are a challenge due to varying levels of tissue quality and  
328 problems with rapid RNA degradation. Despite the fact that we initially used 5 patients on the array with  
329 numerous validation and quality control experiments, the quality of the RNA and the library did not  
330 achieve our criteria for two of the patients. To date, brain tumor tissue has remained a challenge with  
331 this technique. Although we have performed numerous tissue optimization experiments to reduce  
332 transcript diffusion, the diffusion of transcripts through the spots during sample preparation cannot be  
333 totally avoided.

334

335 **Methods:**

336 **Ethical Approval**

337 The local ethics committee of the University of Freiburg approved the data evaluation, imaging  
338 procedures and experimental design (protocol 100020/09 and 472/15\_160880). The methods were  
339 carried out in accordance with the approved guidelines, with written informed consent obtained from all  
340 subjects. The studies were approved by an institutional review board. Further information and requests  
341 for resources, raw data and reagents should be directed and will be fulfilled by the Contact: D. H.  
342 Heiland, dieter.henrik.heiland@uniklinik-freiburg.de. A complete table of all materials used is given in  
343 the supplementary information.

344

345 **T cell isolation and stimulation**

346 Blood was drawn from a healthy human individual into an EDTA (ethylenediaminetetraacetic acid)  
347 cannula. T cells were extracted in a negative selection manner using a MACSxpress® Whole Blood Pan  
348 T Cell Isolation Kit (Miltenyi Biotec). T cells were then transferred in Advanced RPMI 1640 Medium  
349 (ThermoFisher Scientific, Pinneberg, Germany) and split for cytokine treatment: Three technical  
350 replicates were used for each T cell-treatment condition. Interleukin 2 (IL-2, Abcam, Cambridge, UK)  
351 was used at a final concentration of 1 ng/ml, Interleukin 10 (IL-10, Abcam) at 5 ng/ml, Interferon gamma  
352 (IFN- $\gamma$ , Abcam) at 1 ng/ml and Osteopontin (SPP-1, Abcam) at 3  $\mu$ g/ml. Cytokine treatment was  
353 performed in Advanced RPMI 1640 Medium and T cells were incubated at 37°C and 5% CO<sub>2</sub> for 24h.

354

355 **RNA sequencing of stimulated T Cells**

356 The purification of mRNA from total RNA samples was achieved using the Dynabeads mRNA  
357 Purification Kit (Thermo Fisher Scientific, Carlsbad, USA). The subsequent reverse transcription  
358 reaction was performed using SuperScript IV reverse transcriptase (Thermo Fisher Scientific, Carlsbad,  
359 USA). For preparation of RNA sequencing, the Low Input by PCR Barcoding Kit and the cDNA-PCR  
360 Sequencing Kit (Oxford Nanopore Technologies, Oxford, United Kingdom) were used as recommended  
361 by the manufacturer. RNA sequencing was performed using the MinION Sequencing Device, the  
362 SpotON Flow Cell and MinKNOW software (Oxford Nanopore Technologies, Oxford, United Kingdom)  
363 according to the manufacturer's instructions. Samples were sequenced for 48h on two flow-cells.  
364 Basecalling was performed by Albacore implemented in the nanopore software. Only D<sup>2</sup>-Reads with a  
365 quality Score above 8 were used for further alignment.

366

### 367 **Sequence trimming and Alignment**

368 In the framework of this study, we developed an automated pipeline for nanopore cDNA-seq data, which  
369 is available at github (<https://github.com/heilandd/NanoPoreSeq>). First the pipeline set up a new class  
370 termed “Poreseq” by a distinct sample description file. The analysis starts by rearranging the reads from  
371 the *fastq* output from the nanopore sequencer containing all of the D<sup>2</sup>-Reads. All *fastq* files need to be  
372 combined into one file. Multiplexed samples were separated according to their barcode and trimmed by  
373 Porechop (<https://github.com/rrwick/Porechop>). Alignment was performed with minimap2  
374 (<https://github.com/lh3-/minimap2>) and processed with sam-tools.

375

### 376 **Posthoc Analysis of Bulk-RNA-seq**

377 A matrix of counted genes was further prepared by the RawToVis.R  
378 ([github.com/heilandd/VRSD\\_Lab\\_v1.5](https://github.com/heilandd/VRSD_Lab_v1.5)) script containing, normalization of Mapped reads by DESeq,  
379 batch effect removal (ComBat package) and fitting for differential gene expression. Gene set enrichment  
380 analysis was performed by transformation of the log<sub>2</sub> foldchange of DE into a ranked z-scored matrix  
381 which was used as the input. The expression matrix was analysed with AutoPipe  
382 (<https://github.com/heilandd/AutoPipe>) by a supervised machine-learning algorithm and visualized with  
383 a heatmap. Full analysis was visualized by the Visualization of RNA-Seq Data (VRSD\_Lab software,  
384 [github.com/heilandd/VRSD\\_Lab\\_v1.5](https://github.com/heilandd/VRSD_Lab_v1.5)) as a dashboard app based on shiny R-software. We extracted  
385 the 50 top up/down regulated genes respectively of each stimulation with respect to control condition to  
386 construct a stimulation library.

387

### 388 **Single-Cell Suspension for scRNA-sequencing**

389 Tumor tissue was obtained from glioma surgery immediately after resection and was transported in  
390 Phosphate-buffered saline (PBS) in approximately 5 minutes into our cell culture laboratory. Tumor  
391 tissue was processed under a laminar flow cabinet. Tissue was reduced to small pieces using two  
392 scalpels and the tissue was processed with the Neural Tissue Dissociation Kit (T) using C-Tubes  
393 (Miltenyi Biotech, Bergisch-Gladbach, Germany) according to the manufacturer’s instructions. The  
394 Debris Removal Kit from Miltenyi was used according to the manufacturer’s instructions to remove  
395 remaining myelin and extracellular debris. In order to remove the remaining erythrocytes, we  
396 resuspended the pellet in 3,5 ml ACK lysis buffer (ThermoFisher Scientific, Pinneberg, Germany) and

397 incubated the suspension for 5 minutes followed by a centrifugation step (350g, 10 min, RT). Cell  
398 quantification with a hemacytometer was performed after discarding the supernatant and  
399 resuspending the pellet in PBS. Cell suspensions were centrifuged again (350g, 10 min, RT) and  
400 resuspended in freezing medium containing 10% DMSO (Sigma-Aldrich, Schnelldorf, Germany) in FCS  
401 (PAN-Biotech, Aidenbach, Germany). Cell suspensions were immediately placed in a freezing box  
402 containing isopropanol and stored in a -80°C freezer for not more than 4 weeks.

403

#### 404 **Cell sorting by Magnetic Beads**

405 Four frozen single-cell suspensions, originating from one patient with an IDH-mutated glioma and three  
406 patients with an IDH-wildtype glioblastoma (GBM), were thawed and the dead cells were magnetically  
407 labeled and eliminated using a Dead Cell Removal Kit (Miltenyi Biotech). The tumor immune  
408 environment in general and T cells in particular were positively selected by using CD3+-MACS (Miltenyi  
409 Biotech). Cells were stained with trypan blue, counted using a hemacytometer and prepared at a  
410 concentration of 700 cells/ $\mu$ L.

411

#### 412 **Droplet scRNA-sequencing**

413 At least 16000 cells per sample were loaded on the Chromium Controller (10x Genomics, Pleasanton,  
414 CA, USA) for one reaction of the Chromium Next GEM Single Cell 3'v3.1 protocol (10x Genomics),  
415 based on a droplet scRNA-sequencing approach. Library construction and sample indexing was  
416 performed according to the manufacturer's instructions. scRNA-libraries were sequenced on a NextSeq  
417 500/550 High Output Flow Cell v2.5 (150 Cycles) on an Illumina NextSeq 550 (Illumina, San Diego, CA,  
418 USA). The bcl2fastq function and the cell ranger (v3.0) was used for quality control.

419

#### 420 **Postprocessing scRNA-sequencing**

421 We used cell ranger to detect low-quality read pairs of single-cell RNA sequencing (scRNA-seq) data.  
422 We filtered out reads which did not reach the following criteria: (1) bases with quality < 10, (2) no  
423 homopolymers (3) 'N' bases accounting for  $\geq 10\%$  of the read length. Filtered reads were mapped by  
424 STAR aligner and the resulting filtered count matrix further processed by Seurat v3.0 (R-package). We  
425 normalized gene expression values by dividing each estimated cell by the total number of transcripts  
426 and multiplied by 10,000, followed by natural-log transformation. Next, we removed batch effects and  
427 scaled data by a regression model including sample batch and percentage of ribosomal and

428 mitochondrial gene expression. For further analysis we used the 2000 most variable expressed genes  
429 and decomposed eigenvalue frequencies of the first 100 principal components and determined the  
430 number of non-trivial components by comparison to randomized expression values. The obtained non-  
431 trivial components were used for SNN clustering followed by dimensional reduction using the UMAP  
432 algorithm. Differently expressed genes (DE) of each cluster were obtained using a hurdle model tailored  
433 to scRNA-seq data which is part of the MAST package. Cell types were identified by 3 different methods;  
434 Classical expression of signature markers of immune cells; By SingleR an automated annotation tool  
435 for single-cell RNA sequencing data obtaining signatures from the Human Primary Cell Atlas, By SCINA,  
436 a semi-supervised cell type identification tool using cell-type signatures as well as a Gene-Set Variation  
437 Analysis (GSVA). Results were combined and clusters were assigned to the cell type with the highest  
438 enrichment within all models. In order to individually analyze T cells, we used the assigned cluster and  
439 filter for the following criteria. For further analysis T cells were defined by: CD3<sup>+</sup>CD8<sup>+</sup> / CD4<sup>+</sup>CD14<sup>-</sup>LYZ<sup>-</sup>  
440 GFAP<sup>-</sup>CD163<sup>-</sup>IBA<sup>-</sup>.

441

#### 442 **Spatial Transcriptomics**

443 The spatial transcriptomics experiments were done using the 10X Spatial transcriptomics kit  
444 (<https://spatialtranscriptomics.com/>). All the instructions for Tissue Optimization and Library preparation  
445 were followed according to manufacturer's protocol. Here, we briefly describe the methods followed  
446 using the library preparation protocol.

447

#### 448 **Tissue collection and RNA quality control:**

449 Tissue samples from three patients, diagnosed with WHO IV glioblastoma multiforme (GBM), were  
450 included in this study. Fresh tissue collected immediately post resection was quickly embedded in  
451 optimal cutting temperature compound (OCT, Sakura) and snap frozen in liquid N<sub>2</sub>. The embedded  
452 tissue was stored at -80°C until further processing. A total of 10 sections (10µm each) per sample were  
453 lysed using TriZOL (Invitrogen, 15596026) and used to determine RNA integrity. Total RNA was  
454 extracted using PicoPure RNA Isolation Kit (Thermo Fisher, KIT0204) according to the manufacturer's  
455 protocol. RIN values were determined using a 2100 Bioanalyzer (RNA 6000 Pico Kit, Agilent) according  
456 to the manufacturer's protocol. It is recommended to only use samples with an RNA integrity value >7.

457

458

459 **Tissue staining and Imaging:**

460 Sections were mounted onto spatially barcoded glass slides with poly-T reverse transcription primers,  
461 with one section per array. These slides can be stored at -80°C until use. The slides were then warmed  
462 to 37°C, after which the sections were fixed for 10 minutes using 4% para-formaldehyde solution (Carl  
463 Roth, P087.1), which was then washed off using PBS. The fixed sections were covered with propan-2-  
464 ol (VWR, 20842312). Following evaporation for 40 seconds, sections were incubated in Mayer's  
465 Hematoxylin (VWR, 1092490500) for 7 min, bluing buffer (Dako, CS70230-2) for 90 seconds and finally  
466 in Eosin Y (Sigma, E4382) for 1 min. The glass slides were then washed using RNase/DNase free water  
467 and incubated at 37°C for 5 min or until dry. Before imaging, the glass slides were mounted with 87%  
468 glycerol (AppliChem, A3739) and covered with coverslips (R. Langenbrinck, 01-2450/1). Brightfield  
469 imaging was performed at 10x magnification with a Zeiss Axio Imager 2 Microscope, and post-  
470 processing was performed using ImageJ software.

471 The cover slips and glycerol were removed by washing the glass slides in RNase/DNase free water until  
472 the cover slips came off, after which the slides were washed using 80% ethanol to remove any remaining  
473 glycerol.

474

475 **Permeabilization, cDNA synthesis and tissue removal:**

476 For each capture array, 70µL of pre-permeabilization buffer, containing 50U/µL Collagenase along with  
477 0.1% Pepsin in HCl was added, followed by an incubation for 20 minutes at 37°C. Each array well was  
478 then carefully washed using 100µL 0.1x SSC buffer. 70µL of Pepsin was then added and incubated for  
479 11 minutes at 37°C. Each well was washed as previously described and 75µL of cDNA synthesis master  
480 mix containing: 96µL of 5X First strand buffer, 24 µL 0.1M DTT, 255.2µL of DNase/RNase free water,  
481 4.8µL Actinomycin, 4.5µL of 20mg/mL BSA, 24µL of 10mM dNTP, 48µL of Superscript® and 24µL of  
482 RNaseOUT™ was added to each well and incubated for 20 hours at 42°C without shaking. Cyanine 3-  
483 dCTP was used to aid in the determination of the footprint of the tissue section used.

484 Since glioblastoma tissue is a fatty tissue, degradation and tissue removal was carried out using  
485 Proteinase K treatment for which 420µL Proteinase K and PKD buffer (1:7), were added to each well  
486 and then incubated at 56°C for 1hr with intermittent agitation (15 seconds / 3 minutes). After incubation,  
487 the glass slides were washed three times with 100mL of 50°C SSC/SDS buffer with agitation for 10  
488 minutes, 1 minute and finally for 1 minute at 300 rpm. The glass slides were then air-dried at room



489 temperature. Tissue cleavage was carried out by the addition of 70 $\mu$ L of cleavage buffer (320 $\mu$ L  
490 RNase/DNase free water, 104 $\mu$ L Second strand buffer, 4.2 $\mu$ L of 10mM dNTP , 4.8 $\mu$ L of 20 mg/mL BSA  
491 and 48 $\mu$ L of USER™ Enzyme) to each well and incubation at 37°C for 2 hours with intermittent agitation.

492

### 493 **Spot Hybridization:**

494 In order to determine the exact location and quality of each of the 1007 spots, fluorescent Cyanine-3 A  
495 is hybridized to the 5' ends of the surface probes. 75 $\mu$ L of the hybridization solution (20 $\mu$ L of 10 $\mu$ M  
496 Cynaine-3A probe and 20 $\mu$ L of 10 $\mu$ M Cyanine-3 Frame probe in 960 $\mu$ L of 1X PBS) was added to each  
497 well and incubated for 10min at room temperature. The slides were then washed three times with 100ml  
498 of SSC/SDS buffer preheated to 50°C for 10min, 1min and 1min at room temperature with agitation.  
499 The slides were then air-dried and imaged after applying Slowfade® Gold Antifade medium and a cover  
500 slip.

501

### 502 **Library Preparation:**

#### 503 **1. Second Strand Synthesis**

504 5 $\mu$ L second strand synthesis mix containing 20 $\mu$ L of 5X First Strand Buffer, 14 $\mu$ L of DNA polymerase I  
505 (10U/ $\mu$ L) and 3.5 $\mu$ L Ribonuclease H (2U/ $\mu$ L) were added to the cleaved sample and incubated at 16°C  
506 for 2 hours. Eppendorf tubes were placed on ice and 5 $\mu$ L of T4 DNA polymerase (3U/ $\mu$ L) were added  
507 to each strand and incubated for 20 minutes at 16°C. 25 $\mu$ L of 80mM EDTA (mix 30 $\mu$ L of 500mM EDTA  
508 with 158 $\mu$ L DNase/RNase free water) was added to each sample and the samples were kept cool on  
509 ice.

#### 510 **2. cDNA purification**

511 cDNA from the previous step was purified using Agencourt RNAClean XP beads and DynaMag™- 2  
512 magnetic rack, incubated at room temperature for 5 min. Further cleansing was performed by the  
513 addition of 80% Ethanol to the sample tubes, while the samples were still placed in the magnetic rack.  
514 Sample elution was then carried out using 13 $\mu$ L of NTP/water mix.

#### 515 **3. In Vitro Transcription and Purification**

516 cDNA transcription to aRNA was carried out by adding 4 $\mu$ L of reaction mix containing: 10x Reaction  
517 Buffer, T7 Enzyme mix and SUPERaseIn™ RNase Inhibitor (20 U/ $\mu$ L) to 12 $\mu$ L of the eluted cDNA  
518 sample and incubated at 37°C, for 14 hours. The samples were purified using RNA clean XP beads



519 according to the manufacturer's protocol and further eluted into 10 $\mu$ L DNase/RNase free water. The  
520 amount and average fragment length of amplified RNA was determined using the RNA 6000 Pico Kit  
521 (Agilent, 5067-1513) with a 2100 Bioanalyzer according to the manufacturer's protocol.

#### 522 **4. Adapter Ligation**

523 Next, 2.5 $\mu$ L Ligation adapter (IDT) was added to the sample and was heated for 2 min at 70°C and then  
524 placed on ice. A total of 4.5 $\mu$ L ligation mix containing 11.3 $\mu$ L of 10X T4 RNA Ligase, T4 RNA truncated  
525 Ligase 2 and 11.3 $\mu$ L of murine RNase inhibitor was then added to the sample. Samples were then  
526 incubated at 25°C for 1 hour. The samples were then purified using RNAClean XP beads according to  
527 the manufacturer's protocol.

#### 528 **5. Second cDNA synthesis**

529 Purified samples were mixed with 1 $\mu$ L cDNA primer (IDT), 1 $\mu$ L dNTP mix up to a total volume of 12 $\mu$ L  
530 and incubated at 65°C for 5 min and then directly placed on ice. A 1.5ml Eppendorf tube 8 $\mu$ L of the  
531 sample was mixed with 30 $\mu$ L of First Strand Buffer(5X), 7.5 $\mu$ L of DTT(0.1M), 7.5 $\mu$ L of DNase/RNase  
532 free water, 7.5 $\mu$ L of SuperScript® III Reverse transcriptase and 7.5 $\mu$ L of RNaseOUT™ Recombinant  
533 ribonuclease Inhibitor and incubated at 50°C for 1 hour followed by cDNA purification using Agencourt  
534 RNAClean XP beads according to the manufacturer's protocol. Samples were then stored at -20°C.

#### 535 **6. PCR amplification**

536 Prior to PCR amplification, we determined that 20 cycles were required for appropriate amplification. A  
537 total reaction volume of 25 $\mu$ L containing 2x KAPA mix, 0.04 $\mu$ M PCRInPE2 (IDT), 0.4 $\mu$ M PCR InPE1.0  
538 (IDT), 0.5 $\mu$ M PCR Index (IDT) and 5 $\mu$ L of purified cDNA were amplified using the following protocol:  
539 98°C for 3 min followed by 20 cycles at 98°C for 20 seconds, 60°C for 30 seconds, 72°C for 30 seconds  
540 followed by 72°C for 5 minutes. The libraries were purified according to the manufacturer's protocol and  
541 eluted in 20 $\mu$ L EB (elution buffer). The samples were then stored at -20°C until used.

#### 542 **7. Quality control of Libraries**

543 The average length of the prepared libraries was quantified using a Agilent DNA 1000 high sensitivity  
544 kit with a 2100 Bioanalyzer. The concentration of the libraries was determined using a Qubit dsDNA HS  
545 kit. The libraries were diluted to 4nM, pooled and denatured before sequencing on the Illumina NextSeq  
546 platform using paired end sequencing. We used 30 cycles for read 1 and 270 cycles for read 2 during  
547 sequencing.

### Sequence

|                         |                                                             |
|-------------------------|-------------------------------------------------------------|
| <i>Ligation Adapter</i> | /5rApp/AGATCGGAAGAGCACACGTCTGAACTCCAGTCAC/3d- dC/           |
| <i>cDNA primer</i>      | GTGACTGGAGTTCAGACGTGTGCTCTTCCGA                             |
| <i>PCR primer INPE1</i> | AATGATACGGCGACCACCGAGATCTACACTCTTTCCCTACACGACGCTCTT-CCGATCT |
| <i>PCR primer INPE2</i> | GTGACTGGAGTTCAGACGTGTGCTCTTCCGATCT                          |
| <i>PCR index primer</i> | CAAGCAGAAGACGGCATACGAGATCGTGATGTGACTGGAGTTC                 |

548

### 549 **Postprocessing Spatial Transcriptomics**

550 First, we aligned the H&E staining by the use of the st-pipeline ([github.com/SpatialTranscriptomics-](https://github.com/SpatialTranscriptomics-Research/st_pipeline)  
551 [Research/st\\_pipeline](https://github.com/SpatialTranscriptomics-Research/st_pipeline)). The pipeline contains the following steps: Quality trimming and removing of low  
552 quality bases (bases with quality < 10), sanity check (reads same length, reads order, etc..), remove  
553 homopolymers, normalize for AT and GC content, mapping the read2 with STAR, demultiplexing based  
554 on read1, sort for reads (read1) with valid barcodes, annotate the reads with htseq-count, group  
555 annotated reads by barcode (spot position), gene and genomic location (with an offset) to get a read  
556 count ([github.com/SpatialTranscriptomics-Research/st\\_pipeline](https://github.com/SpatialTranscriptomics-Research/st_pipeline)). The pipeline resulted in a gene count  
557 matrix and a spatial information file containing the x and y position and the H&E image. We used the  
558 Seurat v3.0 package to normalize gene expression values by dividing each estimated cell by the total  
559 number of transcripts and multiplied by 10,000, followed by natural-log transformation. As described for  
560 sc-RNA sequencing, we removed batch effects and scaled data by a regression model including sample  
561 batch and percentage of ribosomal and mitochondrial gene expression. For further analysis we used  
562 the 2000 most variable expressed genes and decomposed eigenvalue frequencies of the first 100  
563 principal components and determined the number of non-trivial components by comparison to  
564 randomized expression values. The obtained non-trivial components were used for SNN clustering  
565 followed by dimensional reduction using the UMAP algorithm. Differently expressed genes (DE) of each  
566 cluster were obtained using a hurdle model tailored to scRNA-seq data which is part of the MAST  
567 package. We further build a user-friendly viewer for spatial transcriptomic data (ST\_\_Lab\_v1.4),  
568 available at [github](https://github.com/heilandd/ST_Lab) ([github.cm/heilandd/ST\\_Lab](https://github.com/heilandd/ST_Lab)). The software tool contains various visualization  
569 options: Dimensional reduction given by the UMAP, spatial plots (spatial gene expression), state plots  
570 (scatter plots representative for subgroups reactive states of cells) and spatial correlation (further details  
571 given in the separate sections)

572

573

574

### 575 **Spatial gene expression**

576 For spatial expression plots, we used either normalized and scaled gene expression values (to plot  
577 single genes) or scores of a set of genes, using the 0.5 quantile of a probability distribution fitting. The  
578 x-axis and y-axis coordinates are given by the input file based on the localization at the H&E staining.  
579 We computed a matrix based on the maximum and minimum extension of the spots used (32x33)  
580 containing the gene expression or computed scores. Spots without tissue covering were set to zero.  
581 Next, we transformed the matrix, using the squared distance between two points divided by a given  
582 threshold, implemented in the fields package (R-software) and adapted the input values by increasing  
583 the contrast between uncovered spots. The data are illustrated as surface plots (plotly package R-  
584 software) or as images (graphics package R-software).

585

### 586 **Representation of Cellular States**

587 We aligned cells/spots to variable states regarding to gene sets (GS) that were selected  $GS_{(1,2,...n)}$ . First,  
588 we separated cells into  $GS_{(1+2)}$  versus  $GS_{(2+4)}$ , using the following equation:

$$589 \quad A_1 = \|GS_{(1)}, GS_{(2)}\|_{\infty} - \|GS_{(3)}, GS_{(4)}\|_{\infty}$$

590  $A_1$  defines the y-axis of the two-dimensional representation. In a next step, we calculated the x-axis  
591 separately for spots  $A_1 < 0$  and  $A_1 > 0$ :

$$592 \quad A_1 > 0: A_2 = \log_2 \left( \overline{GS_{(1)}} - \left[ \overline{GS_{(2)}} + 1 \right] \right)$$

$$593 \quad A_1 < 0: A_2 = \log_2 \left( \overline{GS_{(3)}} - \left[ \overline{GS_{(4)}} \right] \right)$$

594 For further visualization of the enrichment of subsets of cells according to gene set enrichment across  
595 the two-dimensional representation, using a probability distribution fitting we transformed the distribution  
596 to representative colors. This representation is an adapted method published by Neftel and colleagues  
597 recently<sup>22,26</sup>.

598

### 599 **Spatial correlation analysis**

600 In order to map spatial correlated gene expression or gene set enrichments we used z-scored ranked  
601 normalized expression values. One gene expression vector or enrichment vector of a gene set is used  
602 to order the spots along a spatial trajectory. We construct the trajectory of spots from lowest ranked to  
603 highest ranked spot (based on z-scored input vectors). The genes of interest (which were correlated

604 with the spatial trajectory) are fitted by loess-fit from the stats-package (R-software) and aligned to the  
605 ranked spots and scaled. Correlation analysis was performed by Pearson's product moment correlation  
606 coefficient. For heatmap illustration the gene order was computed by ordering the maximal peak of the  
607 loess fitted expression along the predefined spatial trajectory.

608

### 609 **Pseudotime trajectory analysis**

610 We down-scaled all 5 clusters of T cells to a total number of 1,500 cells as input for Single-cell  
611 Trajectories Reconstruction, Exploration And Mapping (STREAM). Normalized counts were used as  
612 input. We performed 10 replications of randomized down-scaling and STREAM trajectory  
613 reconstruction. We used STREAM mapping to identify transition genes (genes with reasonable dynamic  
614 along the inferred pseudotime) as well as leaf genes (genes with significant enrichment in a single leaf),  
615 this is further used to reconstruct cell fate decisions along the inferred pseudotime. Pseudotime analysis  
616 were illustrated as stream plots or subway plots (from the STREAM pipeline) or as heatmaps. To build  
617 the heatmap, we aligned each cell along their inferred pseudotime position and fitted the normalized  
618 gene expression. Then we created z-scores for each gene and plot genes by pheatmap function  
619 (pheatmap package, R-software). Genes were ordered by a correlation trajectory of the maximum peak  
620 of the fitted expression and the inferred pseudotime.

621

### 622 **Gene set enrichment analysis**

623 Gene sets were obtained from the database MSigDB v7 and internally created gene sets are available  
624 at [github.com/heilandd](https://github.com/heilandd). For enrichment analysis of single clusters, the normalized and centered  
625 expression data were used and further transformed to z-scores ranging from 1 to 0. Genes were ranked  
626 in accordance to the obtained differential expression values and used as the input for GSEA.

627

### 628 **Identification of cycling cells**

629 We used the set of genes published by Neftel and colleagues to calculate proliferation scores based on  
630 the GSVA package implemented in R-software. The analysis based on a non-parametric unsupervised  
631 approach, which transformed a classic gene matrix (gene-by-sample) into a gene set by sample matrix  
632 resulted in an enrichment score for each sample and pathway. From the output enrichment scores we  
633 set a threshold based on distribution fitting to define cycling cells.

634

635

636

### 637 **Nearest Functionally Connected Neighbor (NFCN)**

638 To identify connected cells that interact by defined activation or inhibition of down-stream signals in the  
639 responder cell, we created a novel model. Therefore, we assumed that a cell-cell interaction is given  
640 only if a receptor/ligand pair induce correspondent down-stream signaling within the responder cell (cell  
641 with expressed receptor). Furthermore, we take into account that the importance of an activator cell (cell  
642 with expressed ligand) can be ranked according to their enriched signaling, which is responsible for  
643 inducing ligand expression. Based on these assumptions we defined an algorithm to map cells along an  
644 interaction-trajectory. The algorithm was designed to identify potential activators from a defined subset  
645 of cells.

646 As input for the analysis we used a normalized and scaled gene expression matrix, a string containing  
647 the subset of target cells, a list of genes defining ligand induction on the one side and receptor signaling  
648 on the other side. These genes were chosen either by the MSigDB v7 database or our stimulation library  
649 explained above. Then, we down-scaled the data to 3000 representative cells including all myeloid cell  
650 types and calculate the enrichment of induction and activation of the receptor/ligand pair. Enrichment  
651 scores were calculated by singular value decomposition (SVD) over the genes in the gene set and the  
652 coefficients of the first right-singular vector defined the enrichment of induction/activation profile. Both  
653 expression values and enrichment scores were fitted by a probability distribution model and cells outside  
654 the 95% quantile were removed. Next, we fitted a model using a non-parametric kernel estimation  
655 (Gaussian or Cauchy-Kernel), on the basis of receptor/ligand expression ( $A_{exp}$ ) and up/downstream  
656 signaling ( $A_{eff}$ ) of each cell ( $i=\{1,..n\}$ ). Both input vectors were normalized and z-scored:

657

$$658 \quad (1) \ n_{exp\ i} = \frac{A_{exp\ i} - \min(A_{exp})}{\max(A_{exp}) - \min(A_{exp})} \quad (2) \ \hat{f}_h(n_{exp\ i}) = \frac{1}{n} \sum_{i=1}^n K_h(n_{exp} - n_{exp\ i})$$

659

660 K is the kernel and  $0.7 > h > 0.3$  is used to adjust the estimator. The model result in a trajectory which  
661 were defined as Ligand(-)Induction(-) to cells of the target subset with Receptor(-)Activation(-). Further  
662 cells were aligned along the “interaction-trajectory”. We defined connected cells by reaching the upper  
663 70% CI in receptor/ligand expression as well as scores of induction/activation. The way of representation  
664 is illustrated schematically in **Figure 3a**.

665

666

667

668 **CNV estimation:**

669 Copy-number Variations (CNVs) were estimated by aligning genes to their chromosomal location and  
670 applying a moving average to the relative expression values, with a sliding window of 100 genes within  
671 each chromosome, as described recently<sup>17</sup>. First, we arranged genes in accordance to their respective  
672 genomic localization using the CONICSmats package (R-software). As a reference set of non-malignant  
673 cells, we in-silico extracted 400 CD8 positive cells (unlikely to be expressed on tumor cells). To avoid  
674 the considerable impact of any particular gene on the moving average we limited the relative expression  
675 values  $[-2.6, 2.6]$  by replacing all values above/below  $exp(i)=|2.6|$ , by using the infercnv package (R-  
676 software). This was performed only in the context of CNV estimation as previously reported<sup>11</sup>.

677

678 **Flow cytometry:**

679 Single-Cell suspensions were obtained after Dead-Cell Removal and CD3 MACS-enrichment. Cells  
680 were incubated with VivaFix™ 398/550 (BioRad Laboratories, CA, USA) according to the  
681 manufacturer's instructions. Cells were fixed in 4% paraformaldehyde (PFA) for 10 minutes. After  
682 centrifugation (350 g; 4°C; 5 min) and removal of the supernatant, the cell pellet was suspended in 0.5  
683 ml 4°C cold FACS buffer. Cell suspension were washed and centrifuged at 350xg for 5 mins, followed  
684 by resuspension in FACS buffer. The washing step was repeated twice. Finally, cells were resuspended  
685 in at least 0.5 to 1 mL of FACS buffer depending on the number of cells. We used a Sony SP6800  
686 spectral analyzer in standardization mode with PMT voltage set to maximum to reach a saturation rate  
687 below 0.1 %. Gating was performed by FCS Express 7 plus at the core facility, University of Freiburg.

688

689 **Immunofluorescence**

690 The same protocol was followed for human neocortical slices with or without microglia and tumor cell  
691 injection. The media was removed and exchanged for 1 mL of 4% paraformaldehyde (PFA) for 1 h and  
692 further incubated in 20% methanol in PBS for 5 minutes. Slices were then permeabilized by incubating  
693 in PBS supplemented with 1 % Triton (TX-100) overnight at 4°C and further blocked using 20% BSA for  
694 4 hours. The permeabilized and blocked slices were then incubated by primary antibodies in 5% BSA-  
695 PBS incubated overnight at 4°C. After washing in PBS, slices were labelled with secondary antibodies  
696 conjugated with Alexa 405, 488, 555, or 568 for 3 hours at room temperature. Finally, slices were

697 mounted on glass slides using DAPI fluoromount (Southern Biotech, Cat. No. 0100-20), as recently  
698 described<sup>19</sup>.

699

## 700 **Human Organotypic Slice Culture**

701 Human neocortical slices were prepared as recently described<sup>19,23</sup>. Capillaries and damaged tissue were  
702 dissected away from the tissue block in the preparation medium containing: Hibernate medium  
703 supplemented with 13 mM D+ Glucose, 30 mM NMDG and 1 mM Glutamax. Coronal slices of 300  $\mu$ m  
704 thickness were sectioned using a vibratome (VT1200, Leica Germany) and incubated in preparation  
705 medium for 10 minutes before plating to avoid any variability due to tissue trauma. Three to four slices  
706 were gathered per insert. The transfer of the slices was facilitated by a polished wide mouth glass  
707 pipette. Slice were maintained in growth medium containing Neurobasal (L- Glutamine) supplemented  
708 with 2% serum free B-27, 2% Anti- Anti, 13 mM D+ Glucose, 1 mM MgSO<sub>4</sub>, 15 mM HEPES (Sigma,  
709 H0887) and 2 mM Glutamax at 5% CO<sub>2</sub> and 37 °C. The entire medium was replaced with fresh culture  
710 medium 24 hours post plating and every 48 hours thereafter.

711

## 712 **Chemical depletion of Microglia from slice cultures**

713 Selective depletion of myeloid cell compartment in human neocortical slices was performed by  
714 supplementing the growth medium with 11  $\mu$ mol of Clodronate (Sigma, D4434) for 72h at 37°C.  
715 Subsequently, the slices were carefully rinsed with growth medium to wash away any debris.

716

## 717 **Tumor/T cell injection onto tissue cultures**

718 *ZsGreen* tagged BTSC#233 cell lines cultured and prepared as described in the cell culture section.  
719 Post trypsinization, a centrifugation step was performed, following which the cells were harvested and  
720 suspended in MEM media at 20,000 cells/ $\mu$ l. Cells were used immediately for injection onto tissue slices.  
721 A 10  $\mu$ L Hamilton syringe was used to manually inject 1  $\mu$ L into the white matter portion of the slice  
722 culture. Slices with injected cells were incubated at 37°C, 5% CO<sub>2</sub> for 7 days and fresh culture medium  
723 was added every 2 days. Blood samples from the same donors from whom we obtained the healthy  
724 cortex for our organotypic slice cultures was drawn into an EDTA-cannula. Peripheral T cells were  
725 isolated using the same MACSxpress® Whole Blood Pan T Cell Isolation Kit (Miltenyi Biotech). T cells  
726 were tagged using the Cell Trace Far Red dye (ThermoFisher Scientific) prior to injection into the slices.  
727 Erythrocytes were eliminated from the suspension using ACK-lysis buffer (Thermo Fisher Scientific).

728

729 **Enzyme linked Immunosorbent Assay**

730 An enzyme linked immunosorbent assay (ELISA) was performed in order to measure cytokine  
731 concentrations of IL-2, IL-10, IL-13 and IFN-gamma in the cell culture medium 24h after T cell injection.

732 The Multi-Analyte ELISArray Kit (Qiagen, Venlo, Netherlands; MEH-003A) was used according to the  
733 manufacturer's instructions. Absorbances were measured using the Tecan Infinite® 200 (Tecan,  
734 Männedorf, Switzerland).

735

736 **Acknowledgement**

737 DHH is funded by the German Cancer Society (Seeding Grand TII), Müller-Fahnenberg Stiftung and  
738 Familie Mehdorn Stiftung. We thank Manching Ku and Dietmar Pfeifer for here helpful advices.

739

740 **Conflict of interests**

741 No potential conflicts of interest were disclosed by the authors.

742

743 **Data availability**

744 scRNA-Sequencing Data available: (in preparation), Accession codes: [www.github.com/heilandd/](http://www.github.com/heilandd/).

745 VisLabv1.5 [https://github.com/heilandd/Vis\\_Lab1.5](https://github.com/heilandd/Vis_Lab1.5), NFCN Algorithm [www.github.com/heilandd/NFCN](http://www.github.com/heilandd/NFCN),

746 SPATA-Lab: [www.github.com/heilandd/-SPATA-Lab](http://www.github.com/heilandd/-SPATA-Lab). Further information and requests for resources,

747 raw data and reagents should be directed and will be fulfilled by the Contact: D. H. Heiland,

748 [dieter.henrik.heiland@uniklinik-freiburg.de](mailto:dieter.henrik.heiland@uniklinik-freiburg.de).

749

750



751  
752 Bibliography

- 753
- 754 1. Darmanis, S. *et al.* Single-Cell RNA-Seq Analysis of Infiltrating Neoplastic Cells at the Migrating  
755 Front of Human Glioblastoma. *Cell Rep.* **21**, 1399–1410 (2017).
  - 756 2. Woroniecka, K. *et al.* T-Cell Exhaustion Signatures Vary with Tumor Type and Are Severe in  
757 Glioblastoma. *Clin. Cancer Res.* **24**, 4175–4186 (2018).
  - 758 3. Chen, Z. & Hambarzumyan, D. Immune microenvironment in glioblastoma subtypes. *Front.*  
759 *Immunol.* **9**, 1004 (2018).
  - 760 4. Sankowski, R. *et al.* Mapping microglia states in the human brain through the integration of high-  
761 dimensional techniques. *Nat. Neurosci.* **22**, 2098–2110 (2019).
  - 762 5. Zhang, L. *et al.* Lineage tracking reveals dynamic relationships of T cells in colorectal cancer.  
763 *Nature* **564**, 268–272 (2018).
  - 764 6. Zheng, C. *et al.* Landscape of Infiltrating T Cells in Liver Cancer Revealed by Single-Cell  
765 Sequencing. *Cell* **169**, 1342–1356.e16 (2017).
  - 766 7. Baitsch, L. *et al.* Exhaustion of tumor-specific CD8<sup>+</sup> T cells in metastases from melanoma patients.  
767 *J. Clin. Invest.* **121**, 2350–2360 (2011).
  - 768 8. Singer, M. *et al.* A Distinct Gene Module for Dysfunction Uncoupled from Activation in Tumor-  
769 Infiltrating T Cells. *Cell* **166**, 1500–1511.e9 (2016).
  - 770 9. Anderson, A. C., Joller, N. & Kuchroo, V. K. Lag-3, Tim-3, and TIGIT: Co-inhibitory Receptors with  
771 Specialized Functions in Immune Regulation. *Immunity* **44**, 989–1004 (2016).
  - 772 10. Im, S. J. *et al.* Defining CD8<sup>+</sup> T cells that provide the proliferative burst after PD-1 therapy. *Nature*  
773 **537**, 417–421 (2016).
  - 774 11. Tirosh, I. *et al.* Dissecting the multicellular ecosystem of metastatic melanoma by single-cell RNA-  
775 seq. *Science* **352**, 189–196 (2016).
  - 776 12. Platten, M., Ochs, K., Lemke, D., Opitz, C. & Wick, W. Microenvironmental clues for glioma  
777 immunotherapy. *Curr Neurol Neurosci Rep* **14**, 440 (2014).
  - 778 13. Filley, A. C., Henriquez, M. & Dey, M. Recurrent glioma clinical trial, CheckMate-143: the game is  
779 not over yet. *Oncotarget* **8**, 91779–91794 (2017).
  - 780 14. Weller, M. *et al.* Rindopepimut with temozolomide for patients with newly diagnosed, EGFRvIII-  
781 expressing glioblastoma (ACT IV): a randomised, double-blind, international phase 3 trial. *Lancet*  
782 *Oncol.* **18**, 1373–1385 (2017).
  - 783 15. Zhang, Z. *et al.* SCINA: A Semi-Supervised Subtyping Algorithm of Single Cells and Bulk Samples.  
784 *Genes (Basel)* **10**, (2019).
  - 785 16. Aran, D. *et al.* Reference-based analysis of lung single-cell sequencing reveals a transitional  
786 profibrotic macrophage. *Nat. Immunol.* **20**, 163–172 (2019).
  - 787 17. Patel, A. P. *et al.* Single-cell RNA-seq highlights intratumoral heterogeneity in primary glioblastoma.  
788 *Science* **344**, 1396–1401 (2014).
  - 789 18. Chen, H. *et al.* Single-cell trajectories reconstruction, exploration and mapping of omics data with  
790 STREAM. *Nat. Commun.* **10**, 1903 (2019).
  - 791 19. Henrik Heiland, D. *et al.* Tumor-associated reactive astrocytes aid the evolution of  
792 immunosuppressive environment in glioblastoma. *Nat. Commun.* **10**, 2541 (2019).

- 793 20. Naito, Y., Takagi, T. & Higashimura, Y. Heme oxygenase-1 and anti-inflammatory M2  
794 macrophages. *Arch. Biochem. Biophys.* **564**, 83–88 (2014).
- 795 21. Qin, Y. *et al.* A Milieu Molecule for TGF- $\beta$  Required for Microglia Function in the Nervous System.  
796 *Cell* **174**, 156–171.e16 (2018).
- 797 22. Neftel, C. *et al.* An integrative model of cellular states, plasticity, and genetics for glioblastoma. *Cell*  
798 **178**, 835–849.e21 (2019).
- 799 23. Ravi, V. M. *et al.* Human organotypic brain slice culture: a novel framework for environmental  
800 research in neuro-oncology. *Life Sci. Alliance* **2**, (2019).
- 801 24. Kling, T. *et al.* Integrative Modeling Reveals Annexin A2-mediated Epigenetic Control of  
802 Mesenchymal Glioblastoma. *EBioMedicine* **12**, 72–85 (2016).
- 803 25. Venteicher, A. S. *et al.* Decoupling genetics, lineages, and microenvironment in IDH-mutant  
804 gliomas by single-cell RNA-seq. *Science* **355**, (2017).
- 805 26. Tirosh, I. *et al.* Single-cell RNA-seq supports a developmental hierarchy in human  
806 oligodendroglioma. *Nature* **539**, 309–313 (2016).
- 807 27. Blank, C. U. *et al.* Defining “T cell exhaustion”. *Nat. Rev. Immunol.* **19**, 665–674 (2019).
- 808 28. Jiang, Y., Li, Y. & Zhu, B. T-cell exhaustion in the tumor microenvironment. *Cell Death Dis.* **6**, e1792  
809 (2015).
- 810 29. Wherry, E. J. T cell exhaustion. *Nat. Immunol.* **12**, 492–499 (2011).
- 811 30. Li, H. *et al.* Dysfunctional CD8 T Cells Form a Proliferative, Dynamically Regulated Compartment  
812 within Human Melanoma. *Cell* **176**, 775–789.e18 (2019).
- 813 31. Woroniecka, K. I., Rhodin, K. E., Chongsathidkiet, P., Keith, K. A. & Fecci, P. E. T-cell Dysfunction  
814 in Glioblastoma: Applying a New Framework. *Clin. Cancer Res.* **24**, 3792–3802 (2018).
- 815 32. Winkler, F. & Bengsch, B. Use of mass cytometry to profile human T cell exhaustion. *Front.*  
816 *Immunol.* **10**, 3039 (2019).
- 817 33. Wurm, J. *et al.* Astrogliosis Releases Pro-Oncogenic Chitinase 3-Like 1 Causing MAPK Signaling  
818 in Glioblastoma. *Cancers (Basel)* (2019).
- 819 34. Priego, N. *et al.* STAT3 labels a subpopulation of reactive astrocytes required for brain metastasis.  
820 *Nat. Med.* **24**, 1024–1035 (2018).
- 821 35. Kaiser, S. *et al.* Neuroprotection after Hemorrhagic Stroke Depends on Cerebral Heme  
822 Oxygenase-1. *Antioxidants (Basel)* **8**, (2019).
- 823 36. Sebastián, V. P. *et al.* Heme Oxygenase-1 as a Modulator of Intestinal Inflammation Development  
824 and Progression. *Front. Immunol.* **9**, 1956 (2018).
- 825
- 826

827 **Figure Description:**

828

829 **Figure 1:** **a)** Illustration of the workflow, tissue specimens are obtained from 7 glioblastoma patients  
830 while 4 patients were used for scRNA-seq and 3 patients for spatial transcriptomics. **b)** Dimensional  
831 reduction using UMAP, cell type was determined by SingleR ([github.com/dviraran/SingleR](https://github.com/dviraran/SingleR)) and  
832 SCINA<sup>15</sup>. **c)** Dimensional reduction (UMAP) of CD3<sup>+</sup>/CD8<sup>+</sup> cells. SNN-clustering reveal 5 different  
833 cluster (upper panel). Pseudotime analysis by single-cell trajectory reconstruction exploration and  
834 mapping (STREAM) revealed 3 branches (bottom panel). **d)** Heatmap of mean single sample GSEA  
835 computed by gene set variation analysis using the C2/C5 /hallmark and C7 gene sets from the MSigDB  
836 and ImmuneSigDB. Differential activation was illustrated by common markers of naive, effector or  
837 exhausted T cells (Dimensional reduction (UMAP) of gene expression, right side). **e)** Dimensional  
838 reduction (UMAP) of gene expression of proliferation marker *MKI67* and *TOP2A* and GSEA plots  
839 illustrate the proliferative capacity of different clusters. **f)** Arrangement of clusters along the pseudotime  
840 illustrated in a subway-plot (STREAM). **g)** Subway plot from the STREAM analysis illustrate the  
841 expression of *TOP2A* as marker for proliferation **h)** GSEA plots indicating IL10 and IFNG response in  
842 C1-4. **i)** Pseudotime enrichment of signature genes of exhaustion or T cell activation<sup>8</sup>, in the upper  
843 panel, scGSEA of the IFNG and IL10 response is shown. At bottom, an illustration of the pseudotime  
844 arrangement indicates the organization of cells in the heatmap.

845

846 **Figure 2:** **a)** Workflow to build a library of stimulated T-cells **b)** T cell stimulation in order to build a library  
847 for cytokine effects, illustrated is a heatmap of the 10 most significant marker genes of each stimulation  
848 state, based on PAMR algorithm implemented in the AutoPipe. **c)** Gene Set Enrichment curves of top  
849 50 up-regulated genes of the IL-10 and IL-2 stimulation. Enrichment was validated in the different cluster  
850 from our scRNA-seq. **d)** Heatmap of different stimulation states, mapped are genes of the four clusters.

851

852 **Figure 3:** **a)** Workflow to explore cell-cell interactions **b)** Cell-cell interaction plot as explained in a). Cells  
853 with an interaction-score above 0.8 are mapped to the UMAP. **c)** A UMAP illustration with representative  
854 connected cells, in the upper panels only the strongest connected cells (quantile over 90%) at the bottom  
855 panels, the UMAP presentation with connection above the 80% and 70% quantile. **d)** Circular plot  
856 indicates the different T cell cluster (right side) and myeloid cluster (left side). Bar charts indicate the  
857 percentage of cells in their respective clusters, for IL10-Receptor cells (right) and IL-10 Ligand cells

858 (left), Fisher's exact test was used for statistical testing. **e**) Volcano plot of differential gene expression  
859 between highly connected cells (CI>97.5%, left side) vs non-connected cells (CI<2.5%, right side),  
860 adjusted  $-\log(p\text{-value})$  (FDR) was used at the y-axis. Red cells are defined by fold-change above 2 and  
861 FDR < 0.05. **f**) Violin plots of gene expression between connected cells (CI>97.5%, left side) vs non-  
862 connected cells (CI<2.5%, right side). Wilcoxon Rank Sum test and FDR adjustment was used for  
863 statistical testing. **g**) Gene Set enrichment analysis of four different gene sets.

864  
865 **Figure 4:** **a**) Workflow of spatial transcriptomics **b**) 2D representation of heterogeneity states of  
866 glioblastoma by Neftel, colors indicate the expression of cycling cells (quantile). **c**) H&E stainings and  
867 correspondent gene expression profiles **(d)** with spatial distribution of T cell exhaustion (signature  
868 cluster 3-4, in red) and T cell activation (cluster 2, green). **e-f**) Spatial gene expression map of signature  
869 genes of cluster 3 (left top) or IL-10 stimulation (right top), map of tumor heterogeneity in accordance to  
870 the signature of Neftel et al., 2019. **g**) Heatmap of spots mapped along a trajectory that represents T  
871 cell exhaustion, the heatmap shows the gene expression of subtype signature genes (indicated at the  
872 left side).

873  
874 **Figure 5:** **a-b**) Cell-cell interaction plot as explained in Figure 4a). Cells with an interaction-score above  
875 0.8 are mapped to the spatial position and the density of connectivity is given in b) as a heatmap.  
876 c) Spatial gene expression maps of all patients with enrichment of exhaustion (Cluster3) in the upper  
877 panel and inflammatory-alternative activated phenotype of myeloid cells in the bottom part.

878  
879 **Figure 6:** **a**) Experimental workflow of the neocortical slice model with and without myeloid cell depletion.  
880 **b**) Immunostainings of IBA1 (Macrophages and Microglia) in magenta and HMOX1 in cyan, tumor cells  
881 are illustrated by grey. In the upper panel, the control set with maintained myeloid cells (M<sup>+</sup>) is shown,  
882 the bottom panel contains the myeloid cell depleted slices. **c**) Cytokine level of IL10 measured by ELISA  
883 from the medium. **d**) Immunostainings of T cells (CSFE-Tagged, in red) and GZMB a marker of T cell  
884 activation (green). **e-f**) ELISA measurements of IL2 and IFN $\gamma$ . **g**) Immunostainings of TIM3 (gene:  
885 *HAVCR2*) in yellow, which was identified in the scRNA-seq, and T cell in red. P-values are determined  
886 by one-way ANOVA (c,e,f) adjusted by Benjamini-Hochberger (c,e,f) for multiple testing. Data is given  
887 as mean  $\pm$  standard deviation.

888

889 **Supplementary Figures:**

890

891 **Supplementary Figure1:** a) UMAP representation of all cluster. b) Correlation matrix of all clusters c-  
892 d) Distribution of cell types and patients across all clusters. e) Signature genes of each cluster f) UMAP  
893 representation of signature cell type markers.

894

895 **Supplementary Figure2:** a) Copy-number alterations based on single cell data. Only a small subset of  
896 tumor cells was found in the OPC cluster.

897

898 **Supplementary Figure3:** a) Heatmap indicates marker genes of different T cell states. b) UMAP  
899 presentation of T cell clusters with color-coded expression of the Singer signatures of T cell states. c)  
900 Dimensional reduction (UMAP) of gene expression of CTLA4 and PDCD1 as well IFNG and GZMB (d).

901

902 **Supplementary Figure4:** a) Dimensional reduction (UMAP) of gene expression in the full sc-dataset.  
903 Colors indicate gene expression across all clusters.

904

905 **Supplementary Figure5:** a) Kaplan-Meier survival estimation of HMOX1 high/low expression GBM. b-  
906 c) Expression of HMOX1 in different regions of the tumor (b) and in de-novo and recurrent stage (c).

907

**Figure 1**

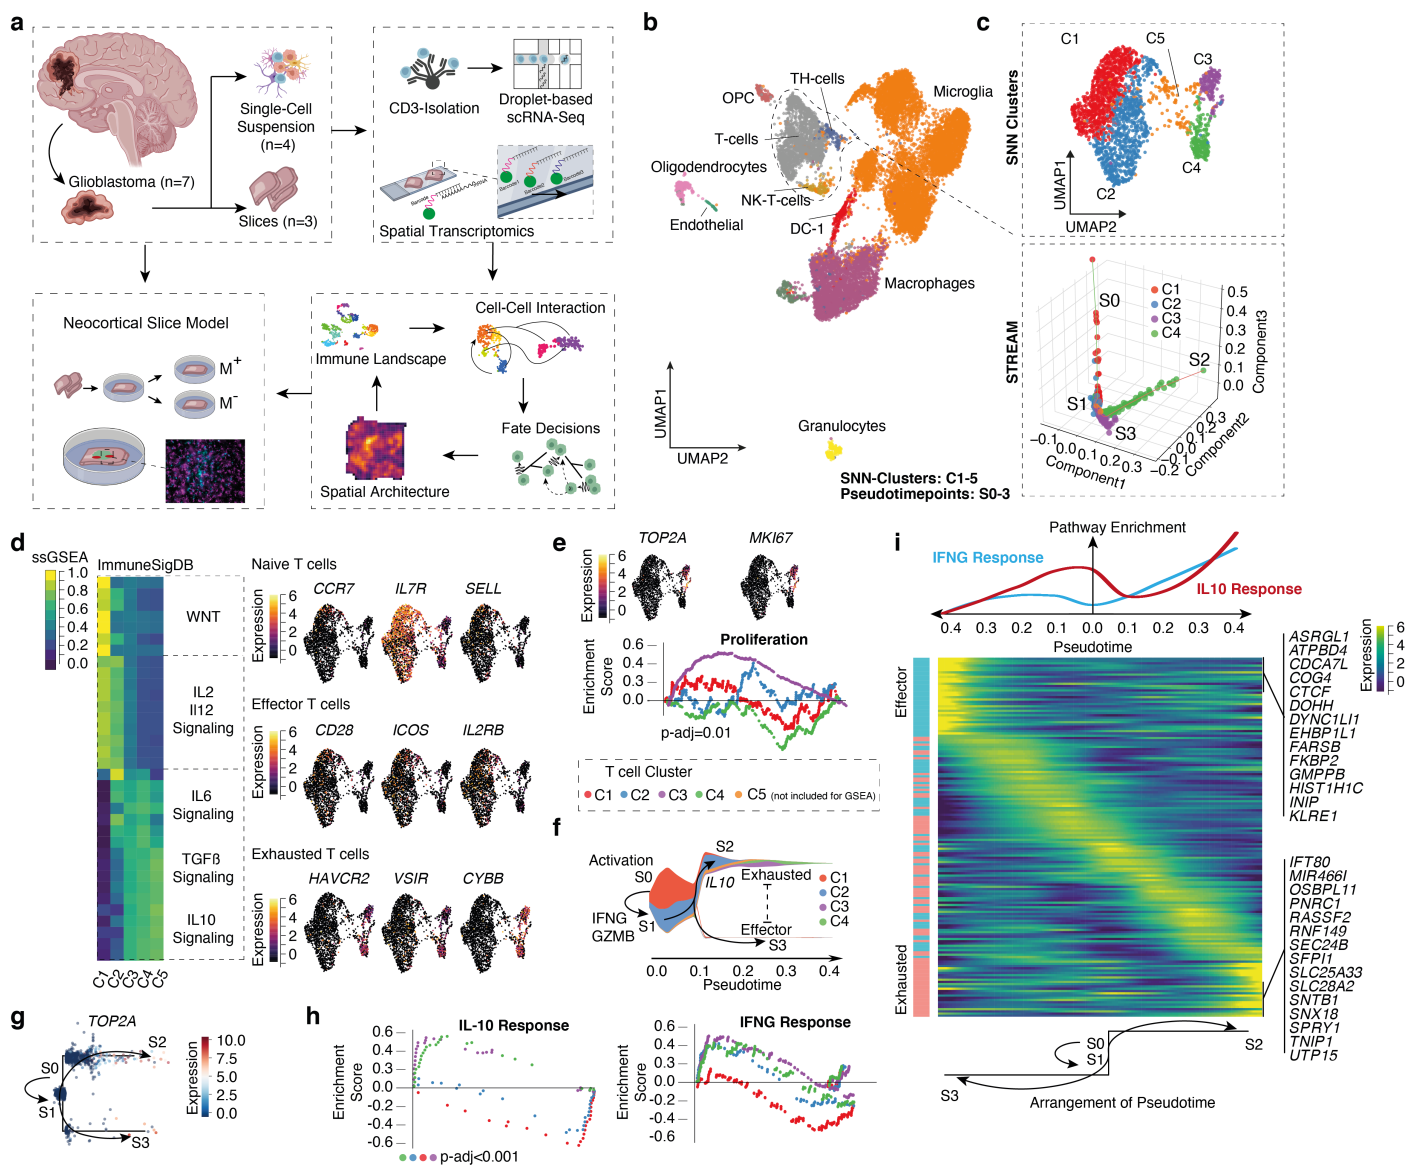

**Figure 2**

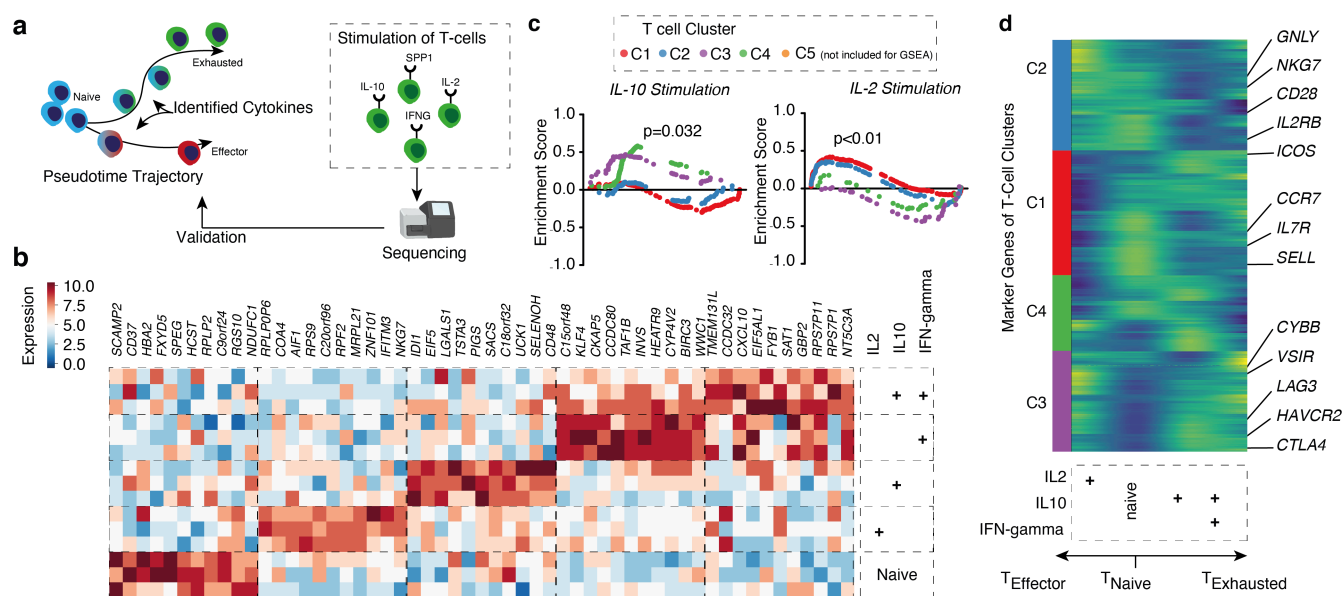



**Figure 3**

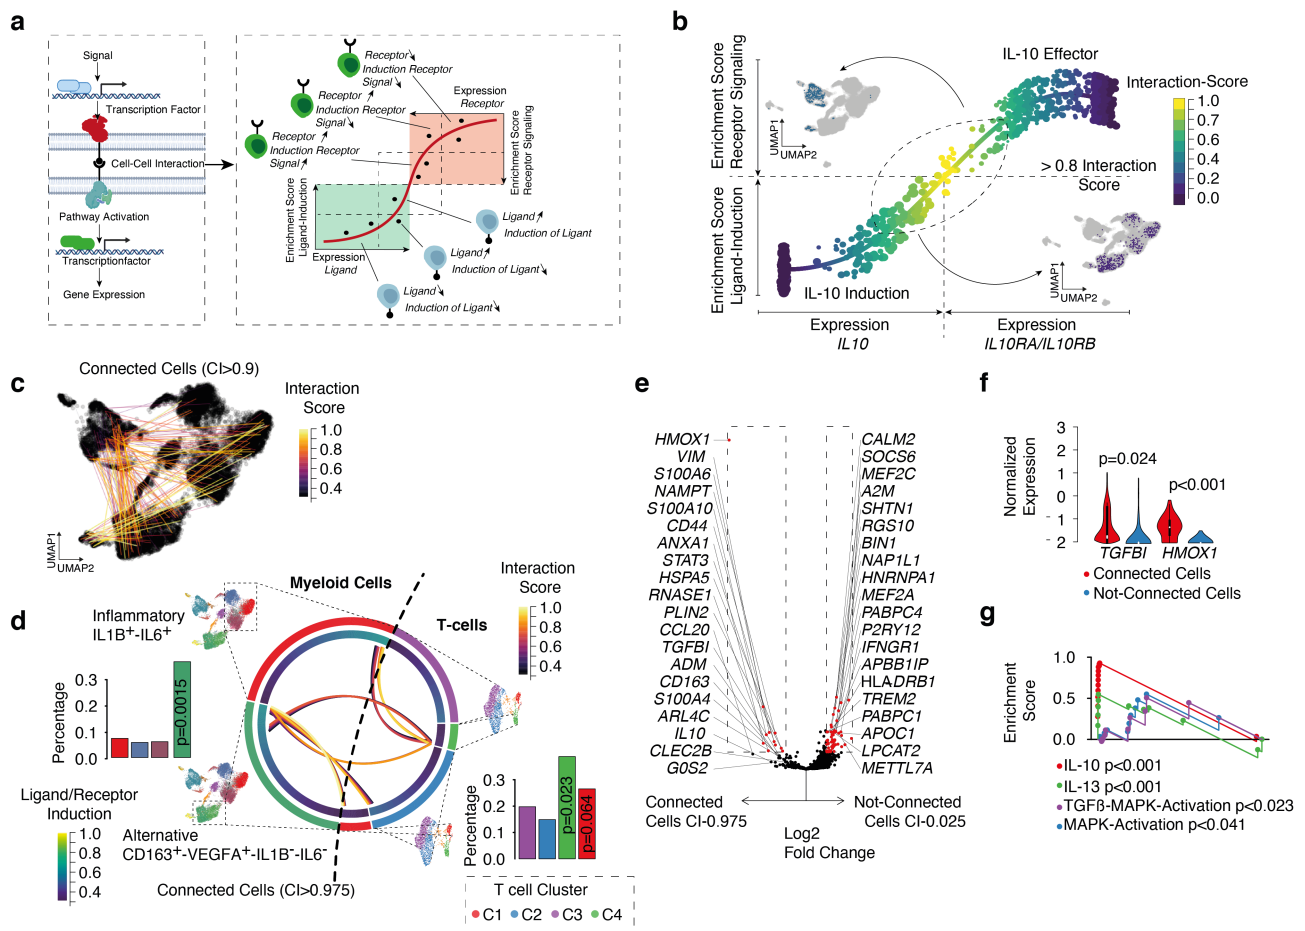



Figure 4

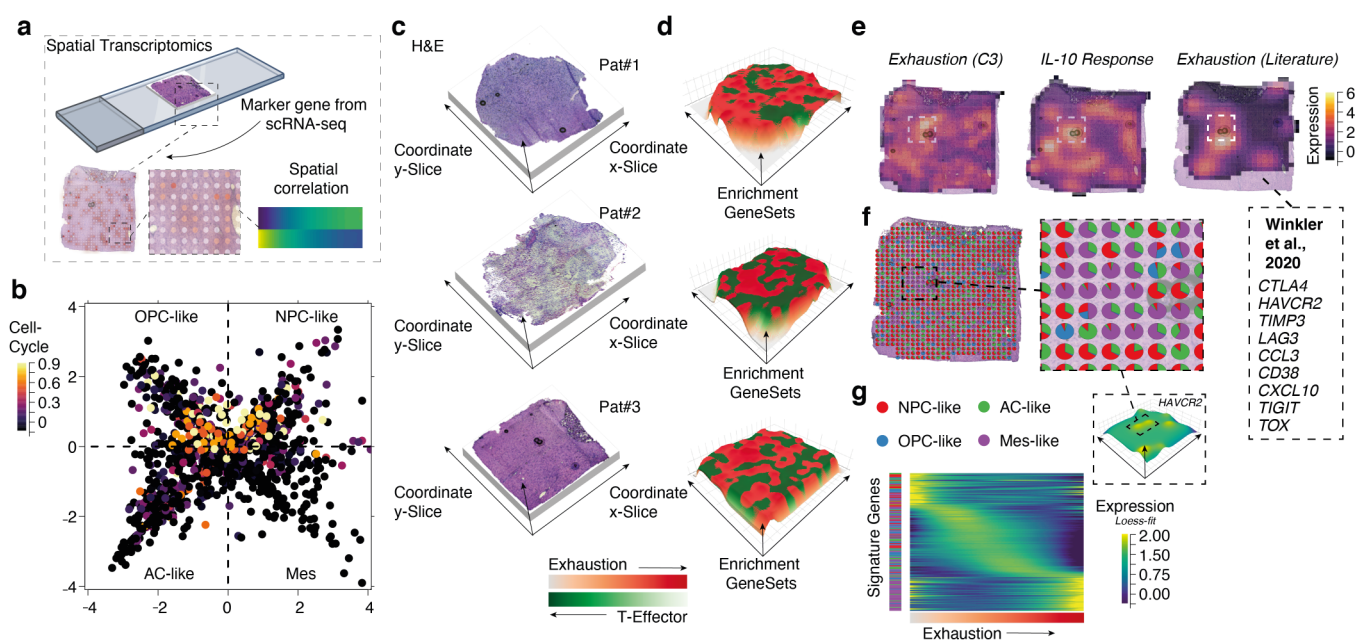

Figure 5

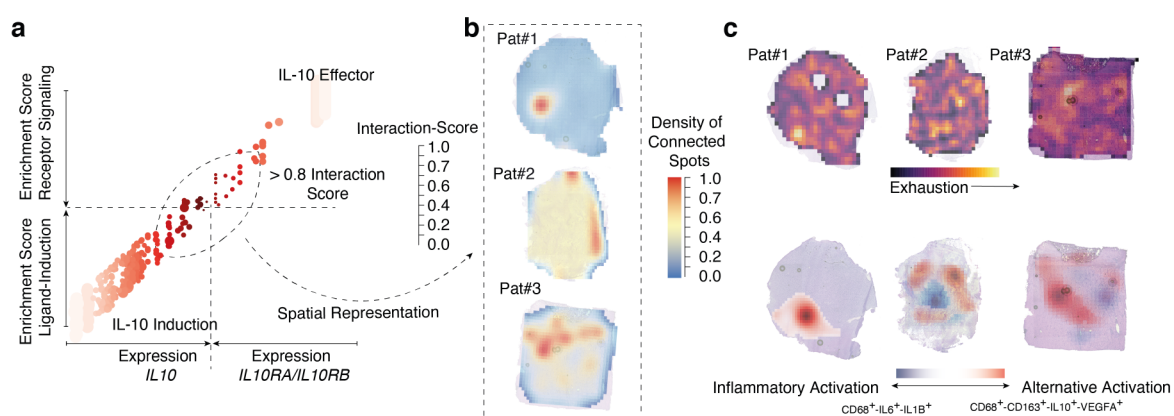

**Figure 6**

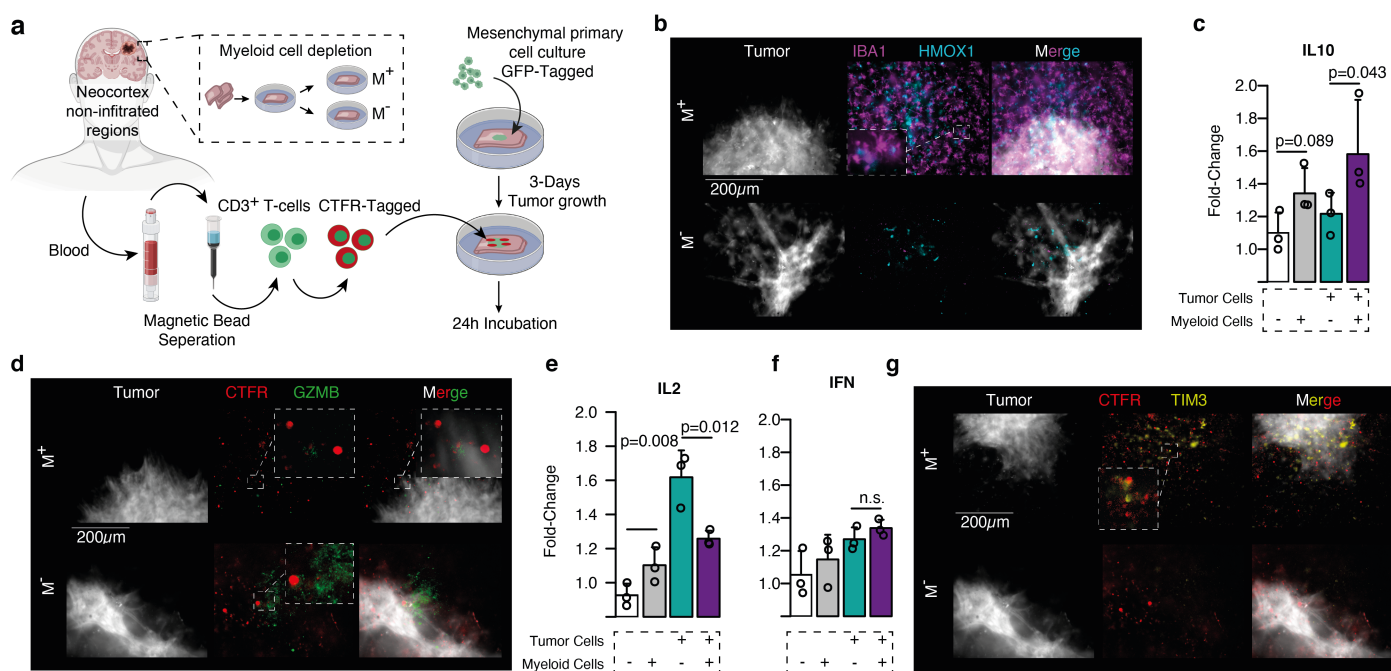

## Supplementary Figure 1

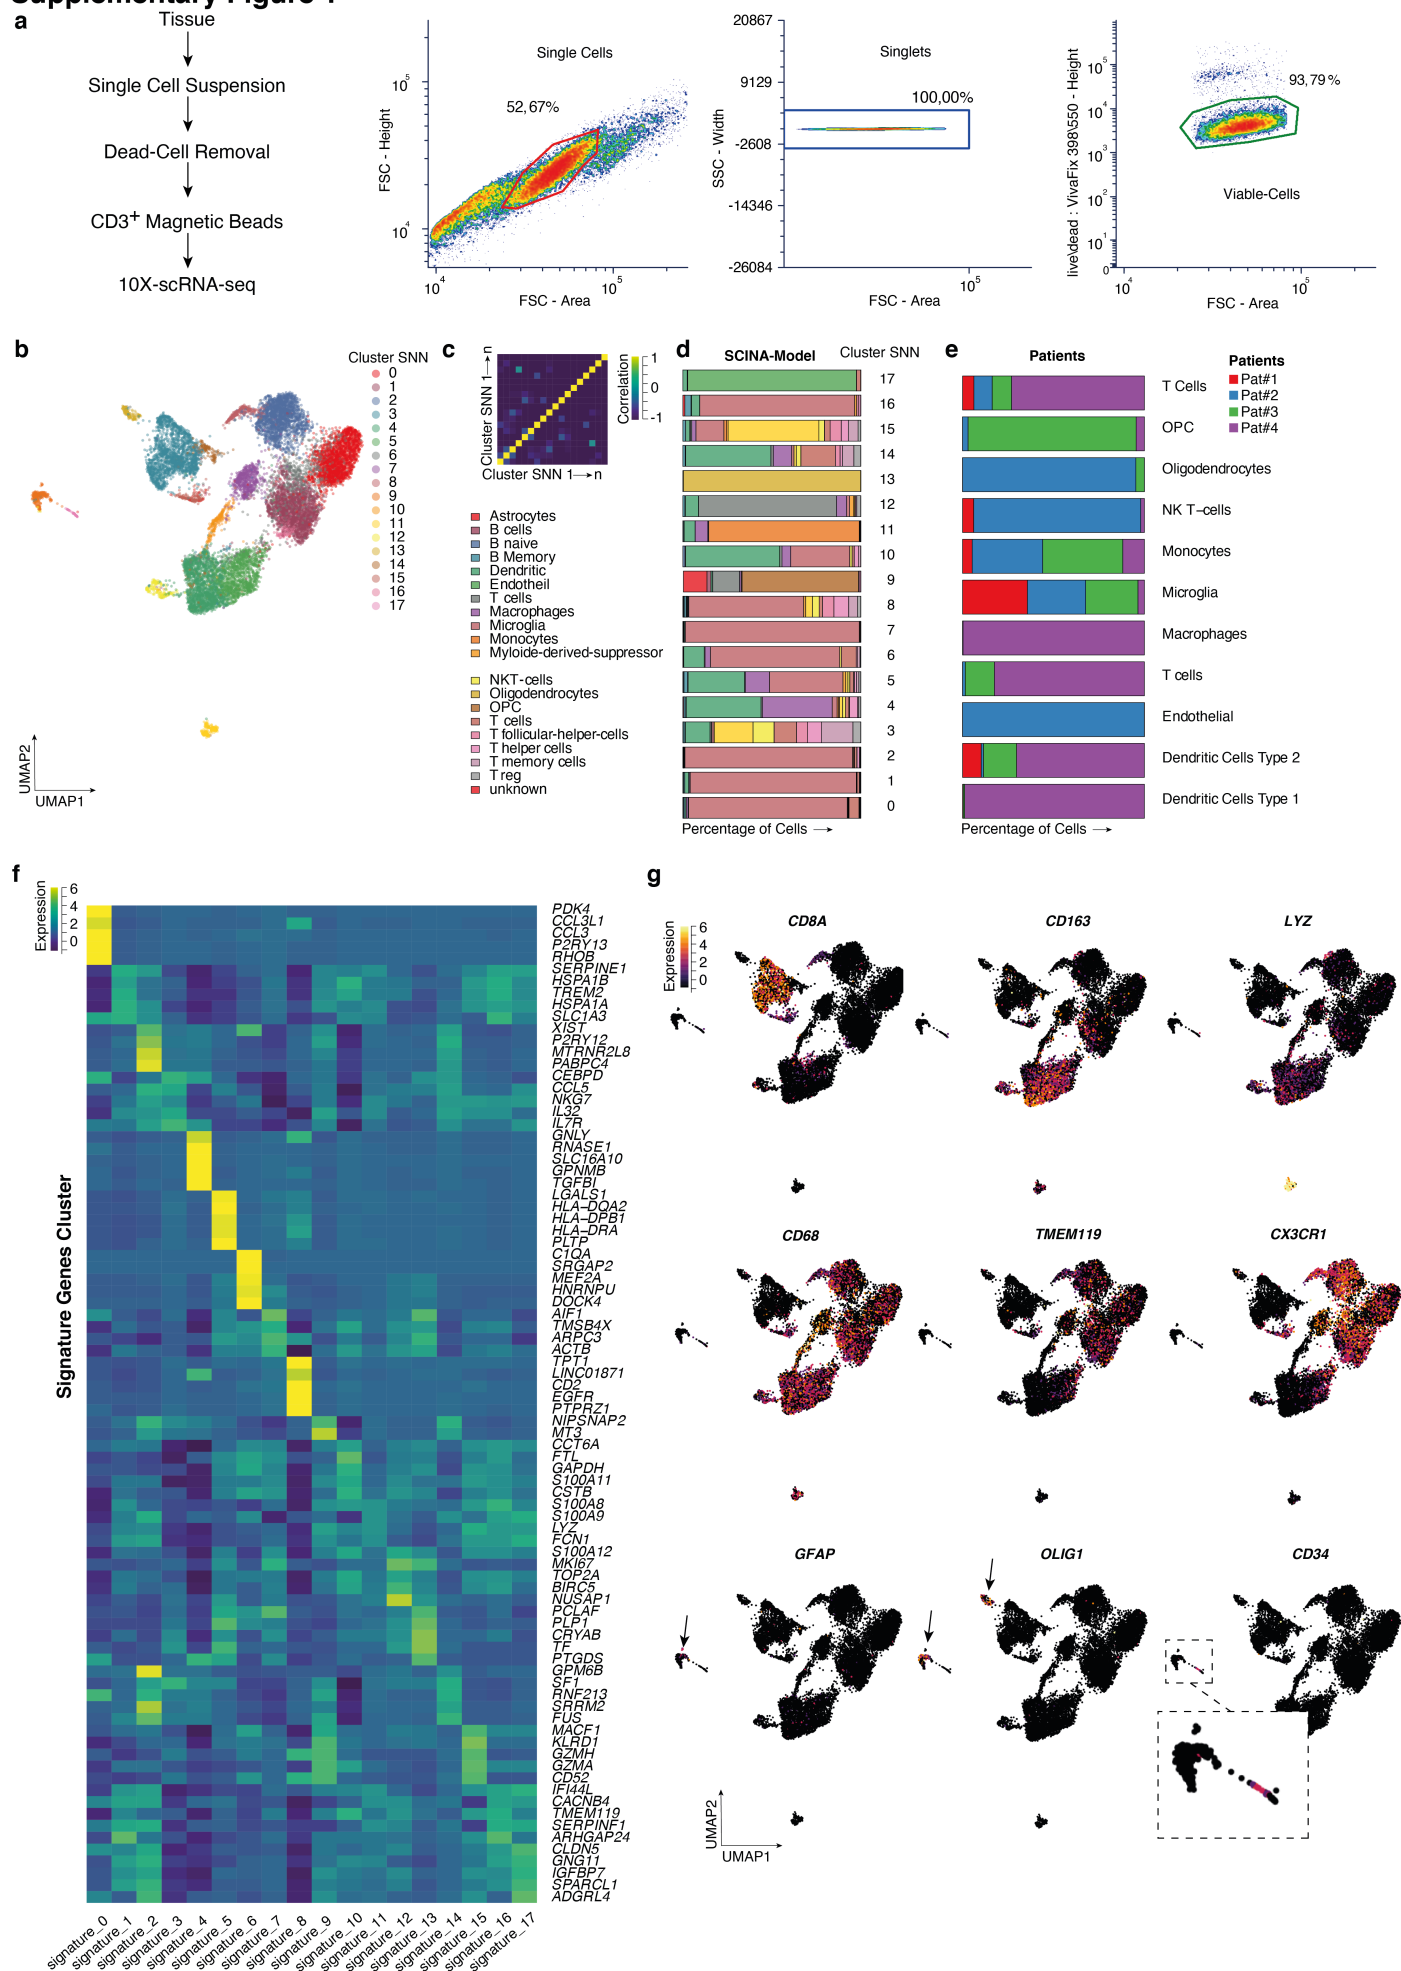

## Supplementary Figure 2

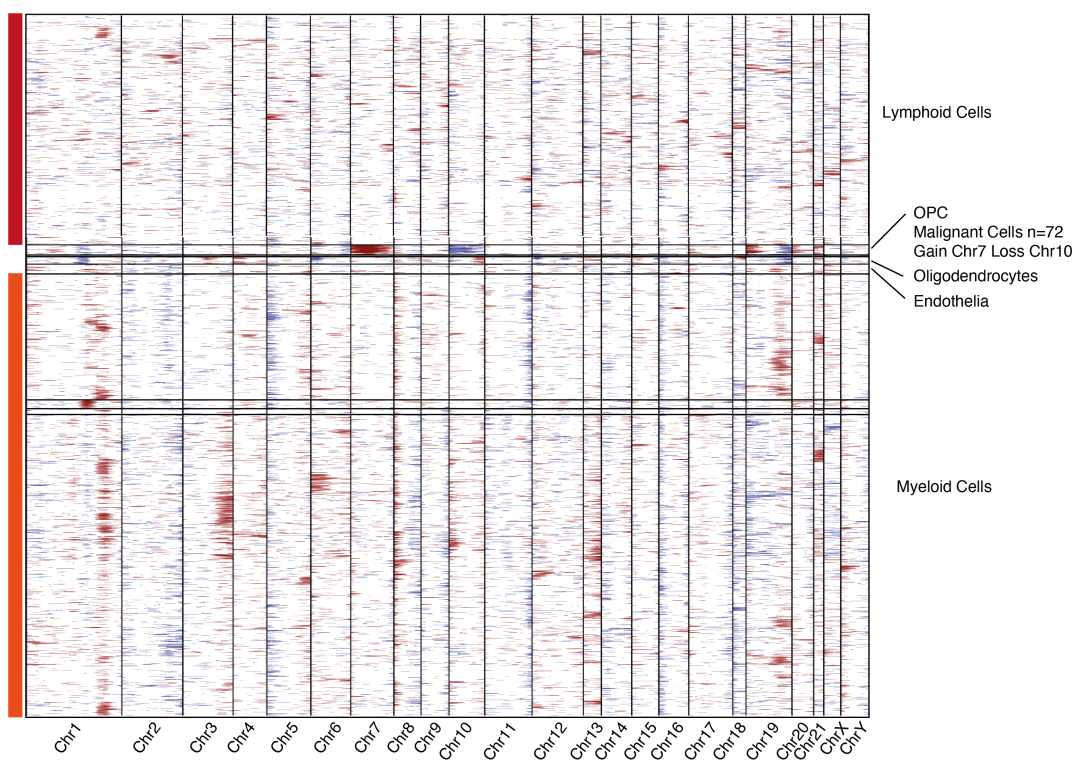

### Supplementary Figure 3

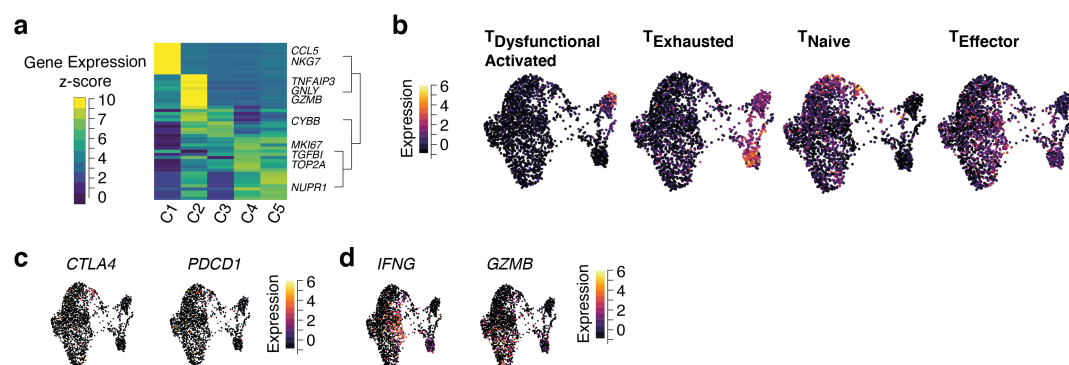

### Supplementary Figure 4

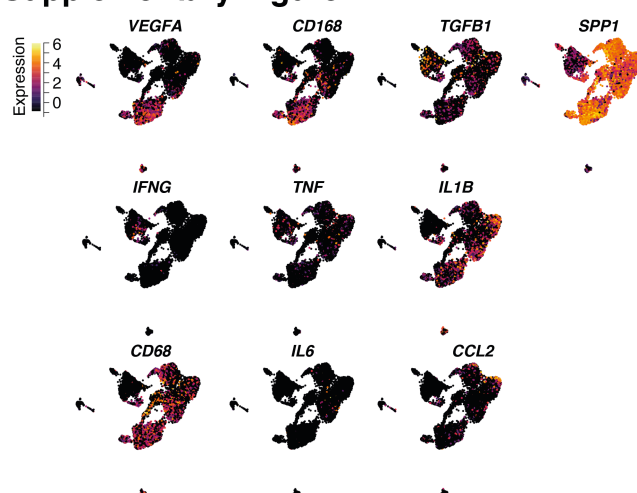



## Supplementary Figure 5

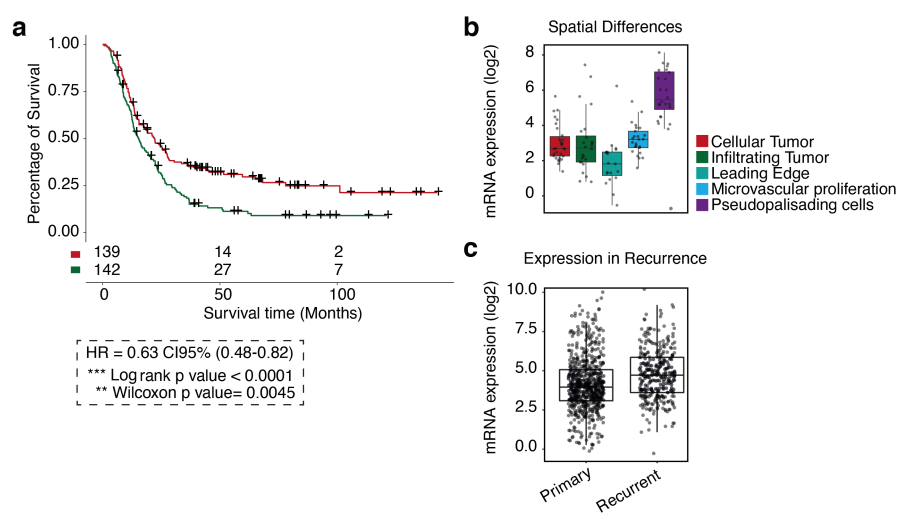

Source: http://biorxiv.org/content/10.1101/2020.06.01.121467v1.full.pdf
